# Supplementary material for: Synthesis and in vitro antibacterial activity of novel fluoroalkyl-substituted pyrazolyl oxazolidinones
Source: Royal Society of Chemistry journal article supplement (doi:10.1039/c5ra11782h), 2015-01-01

## Supplementary Information

### **Synthesis and in vitro antibacterial activity of novel fluoroalkyl-substituted pyrazolyl oxazolidinones**

Lili Yan,<sup>a</sup> Jingjing Wu,<sup>\*a</sup> Heng Chen,<sup>a</sup> Shaowu Zhang,<sup>a</sup> Zhi Wang,<sup>a</sup> Hui Wang<sup>b</sup> and Fanhong Wu<sup>\*a</sup>

<sup>a</sup> Department of Pharmaceutical Engineering, School of Chemical and Environmental Engineering, Shanghai Institute of Technology (*SIT*), Shanghai 201418, China. E-mail: wujj@sit.edu.cn; wfh@sit.edu.cn; Fax: +86 21 60877231; Tel: +86 21 60877220.

<sup>b</sup> Department of Microbiology, School of Life Science and Technology, China Pharmaceutical University, Nanjing 210009, China.

HRMS, <sup>1</sup>H NMR, <sup>13</sup>C NMR and <sup>19</sup>F NMR spectra of **13a**

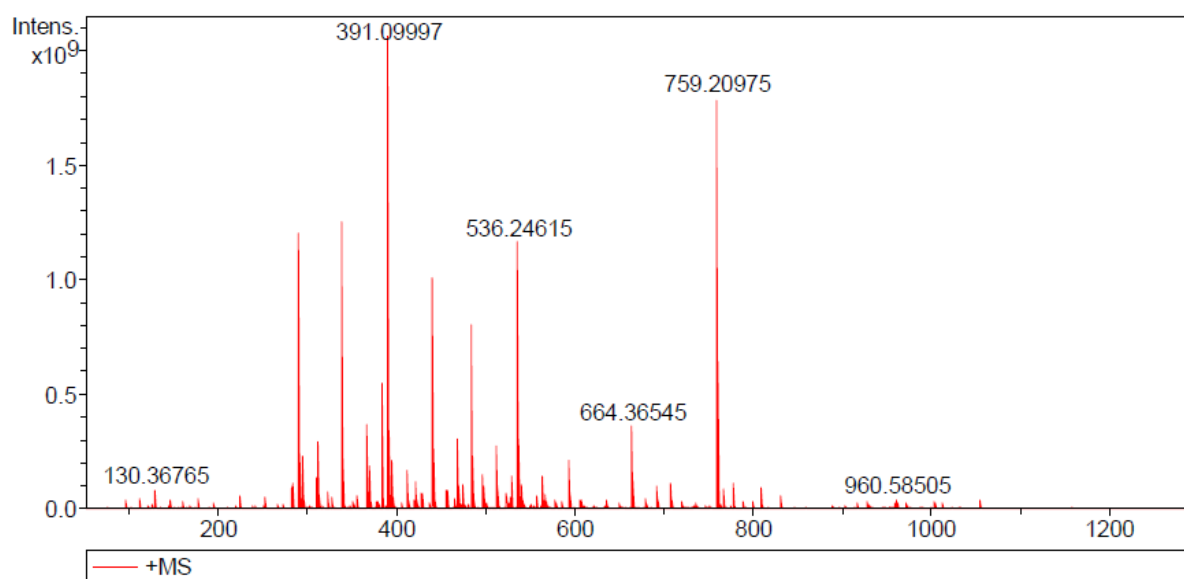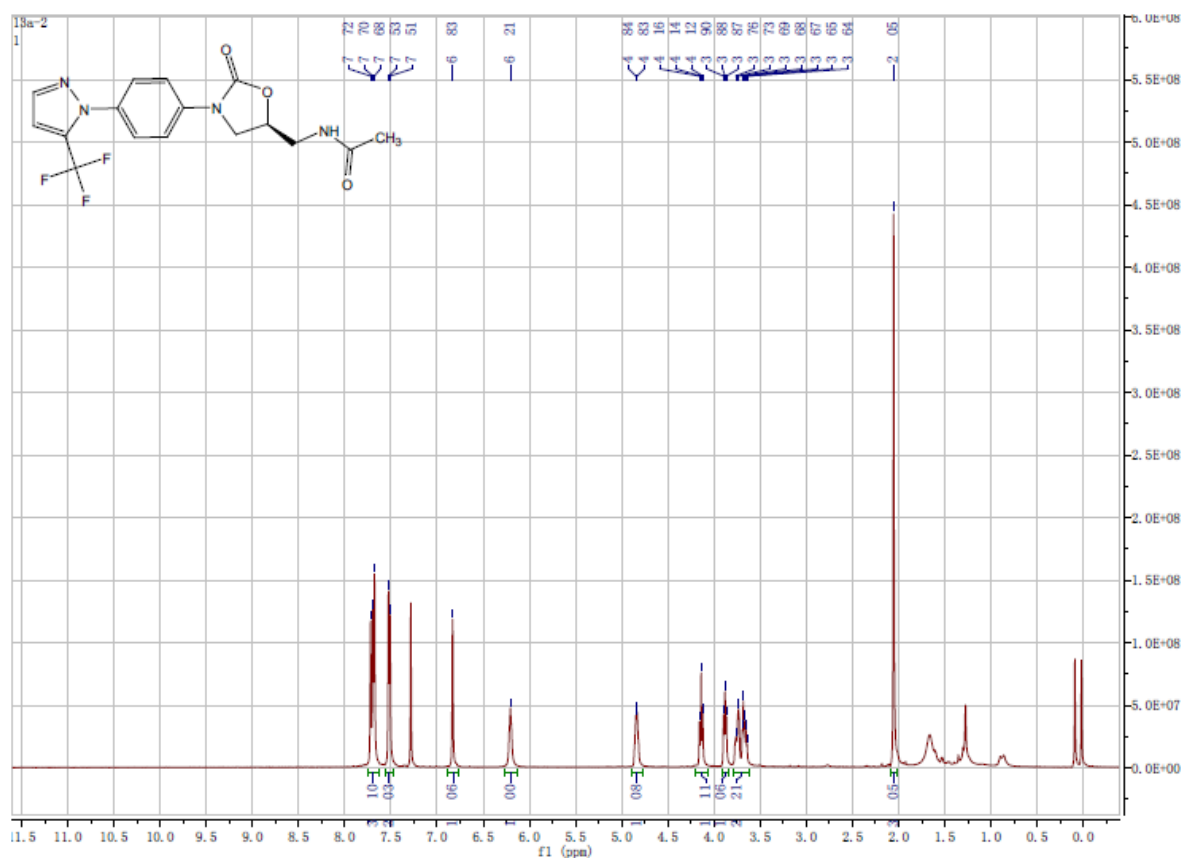

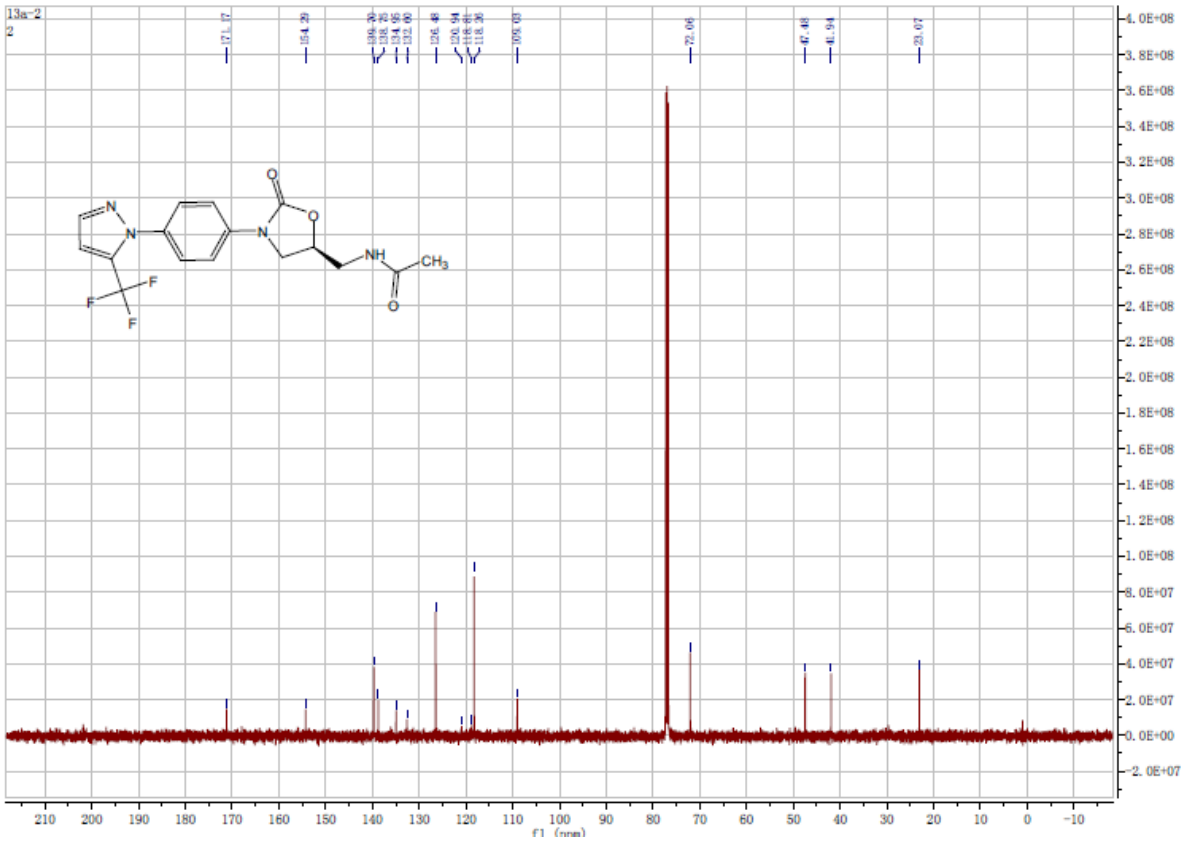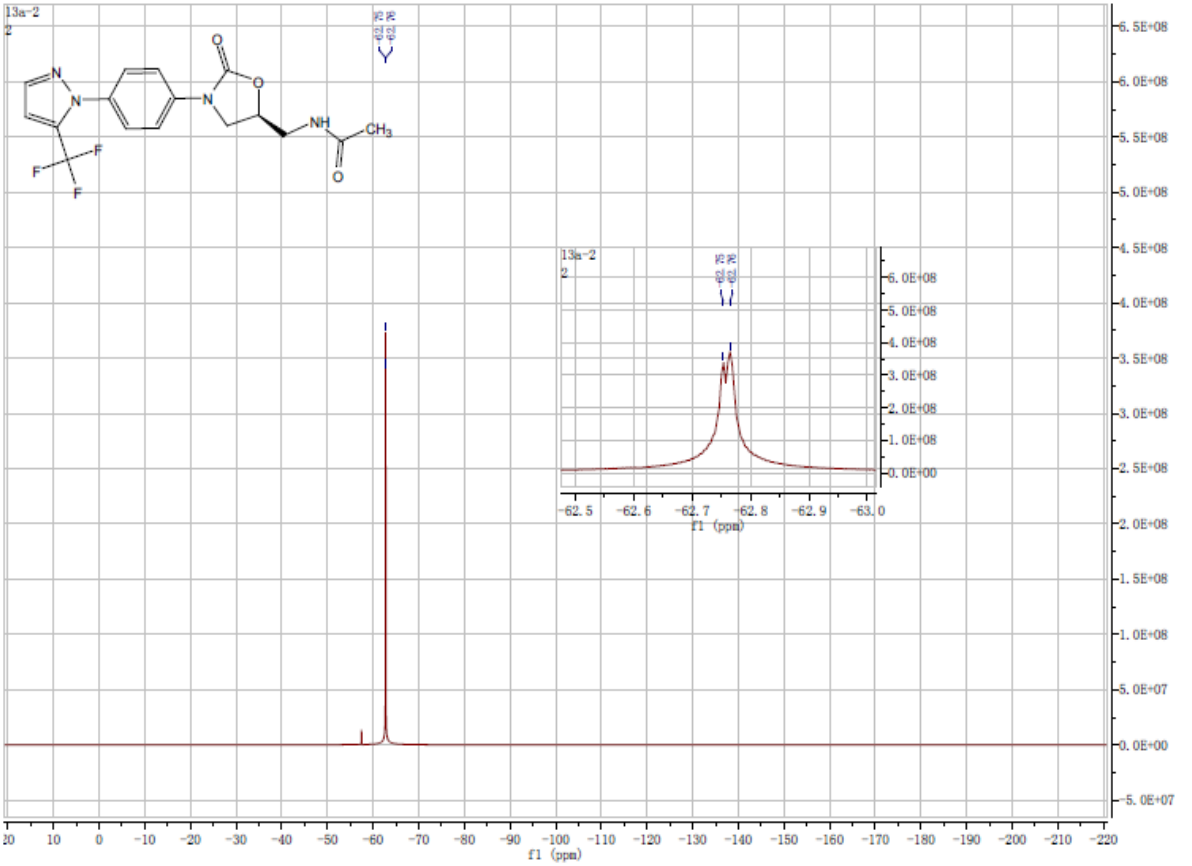

HRMS,  $^1\text{H}$  NMR,  $^{13}\text{C}$  NMR and  $^{19}\text{F}$  NMR of **13b**

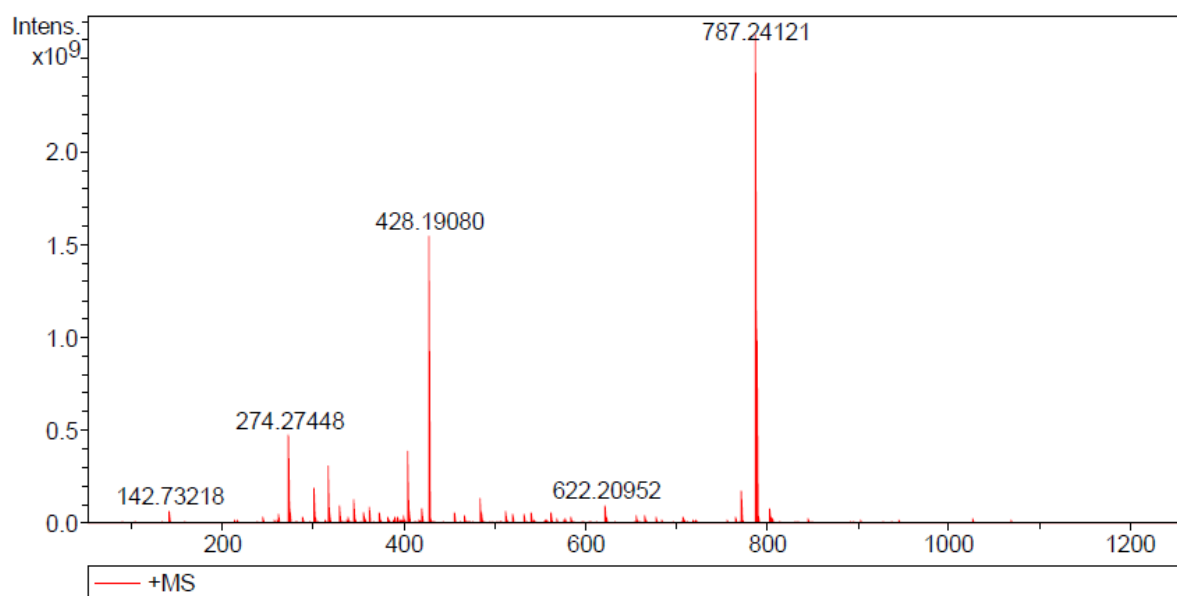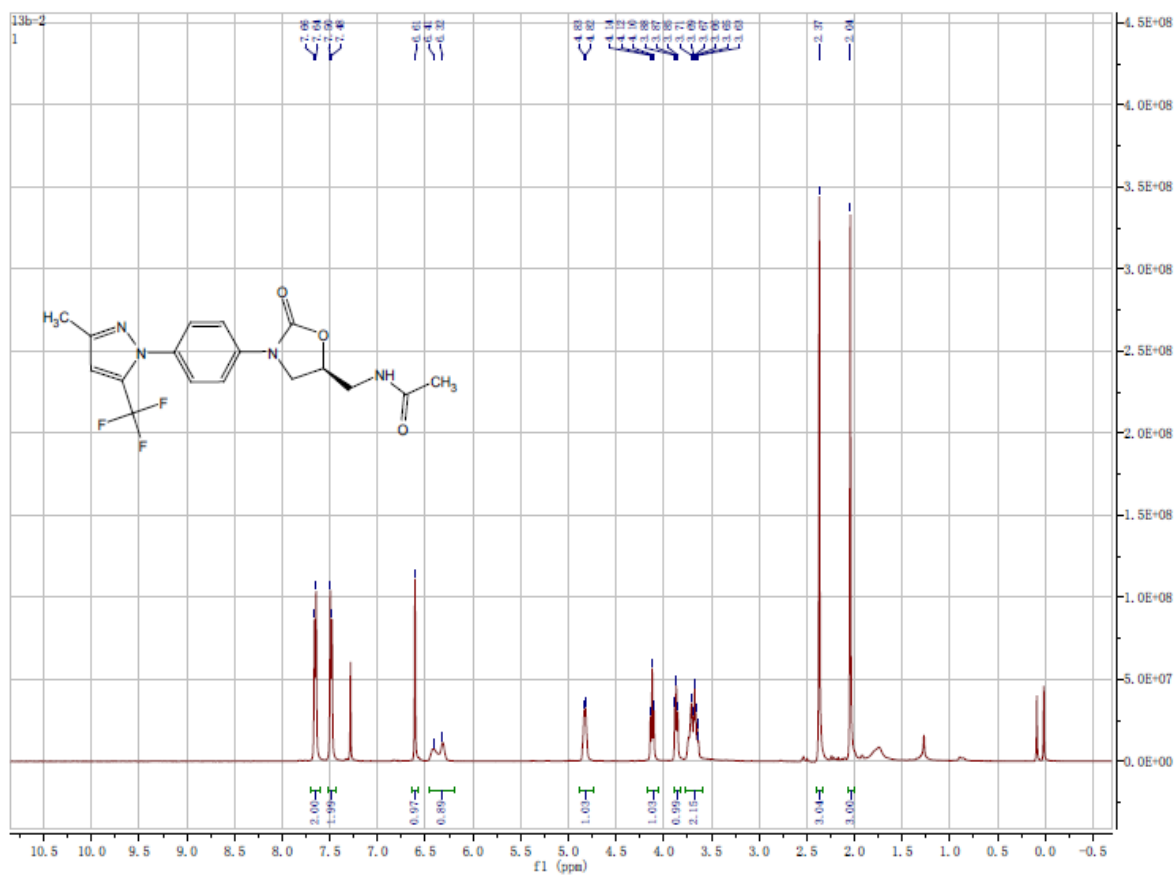

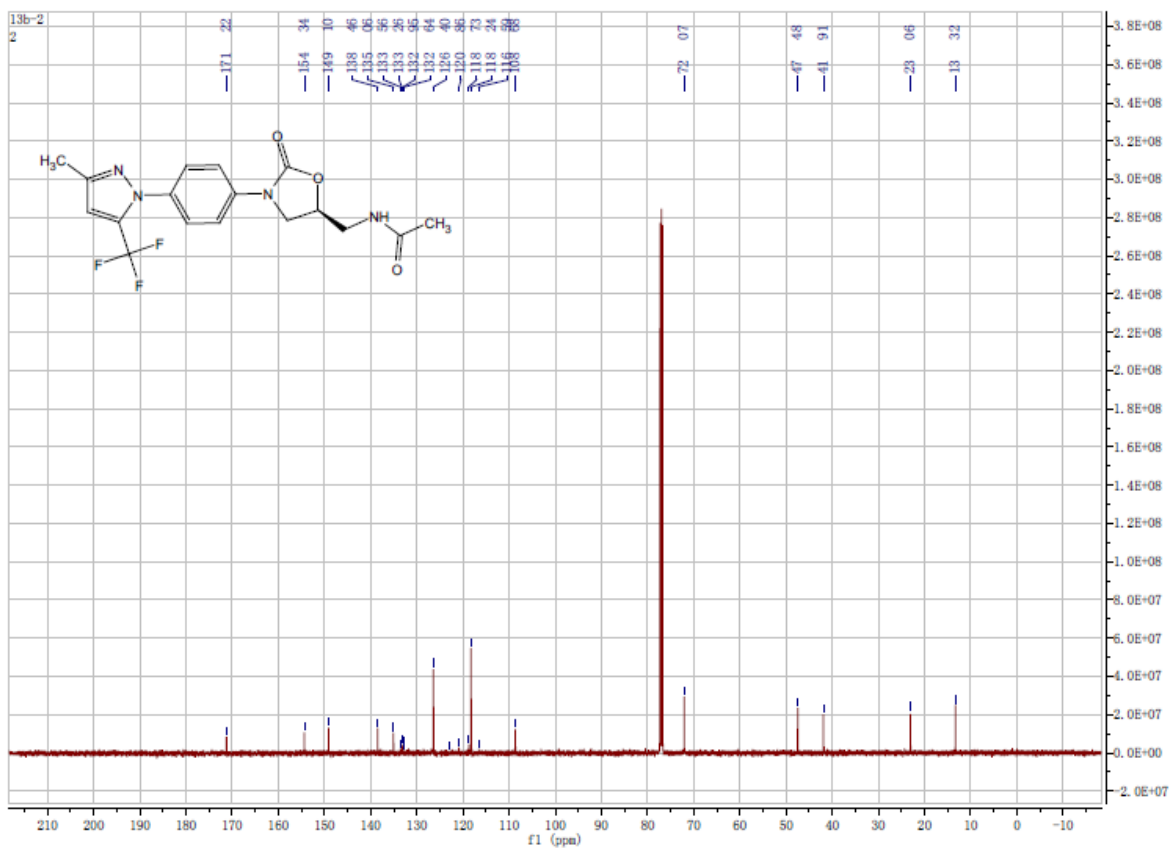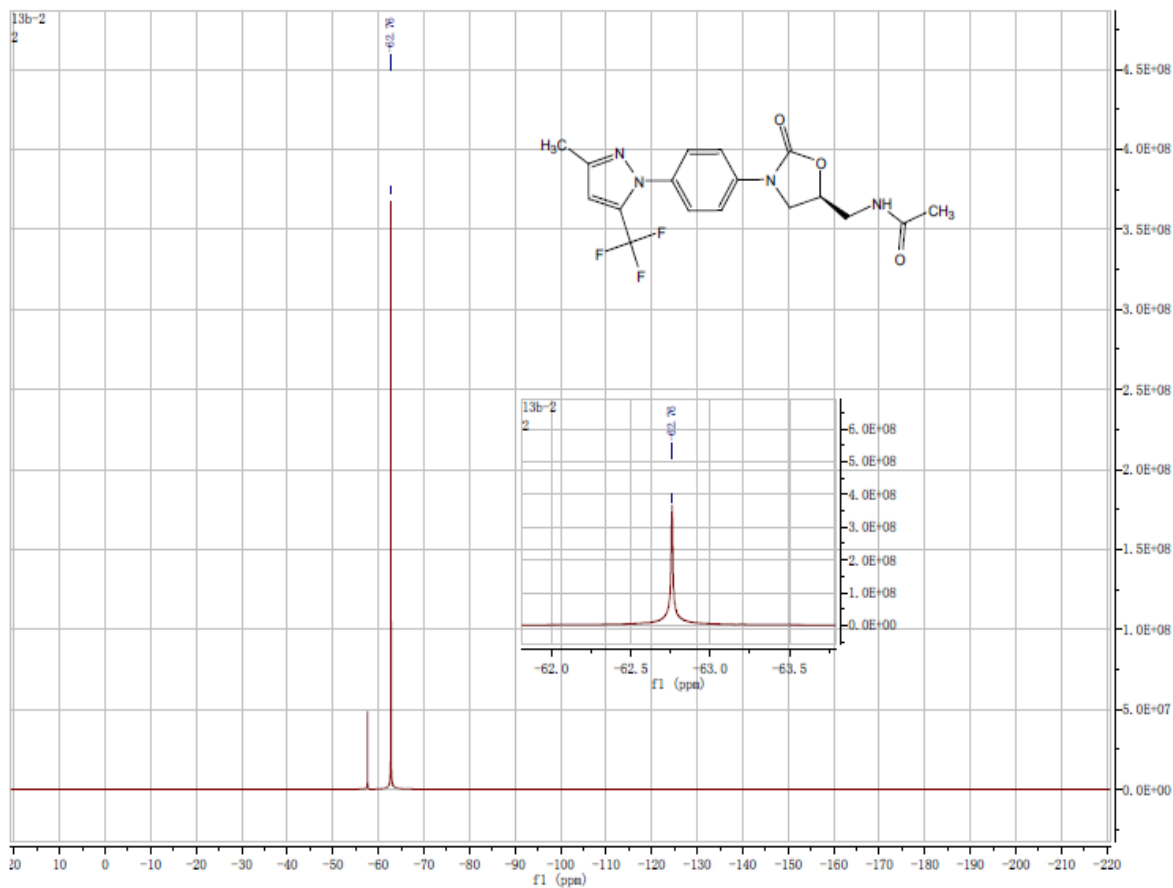

HRMS, <sup>1</sup>H NMR, <sup>13</sup>C NMR and <sup>19</sup>F NMR spectra of **13c**

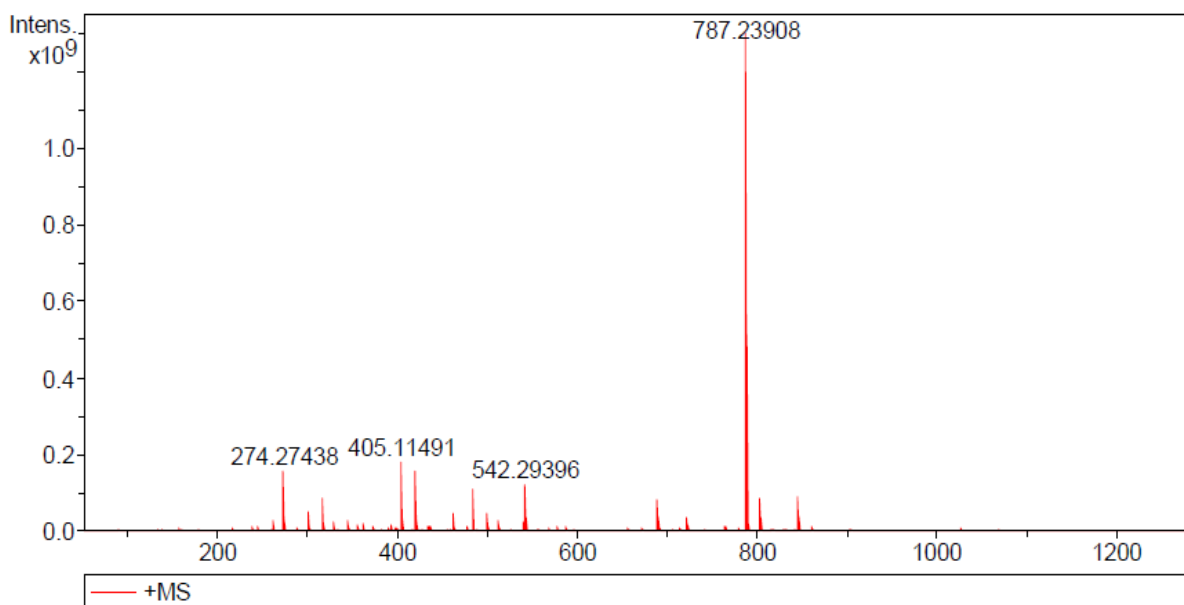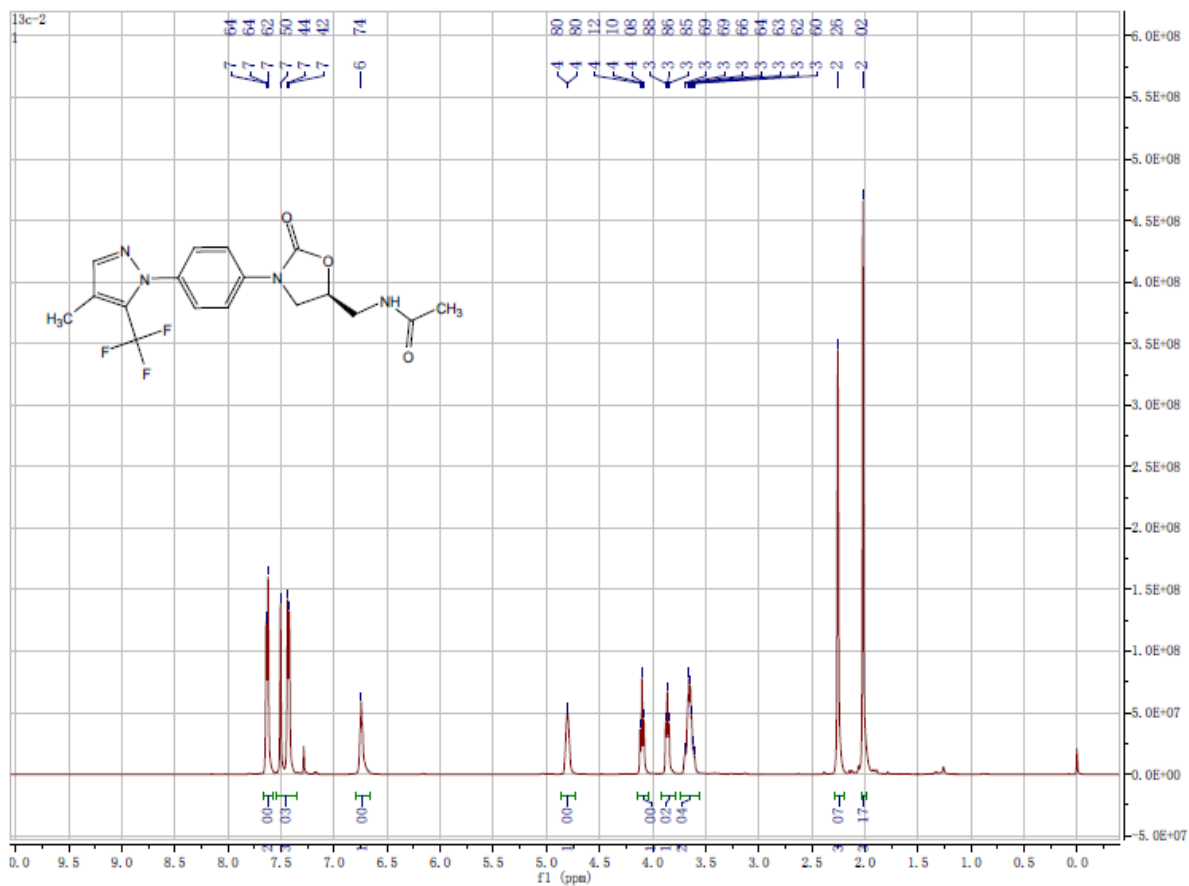

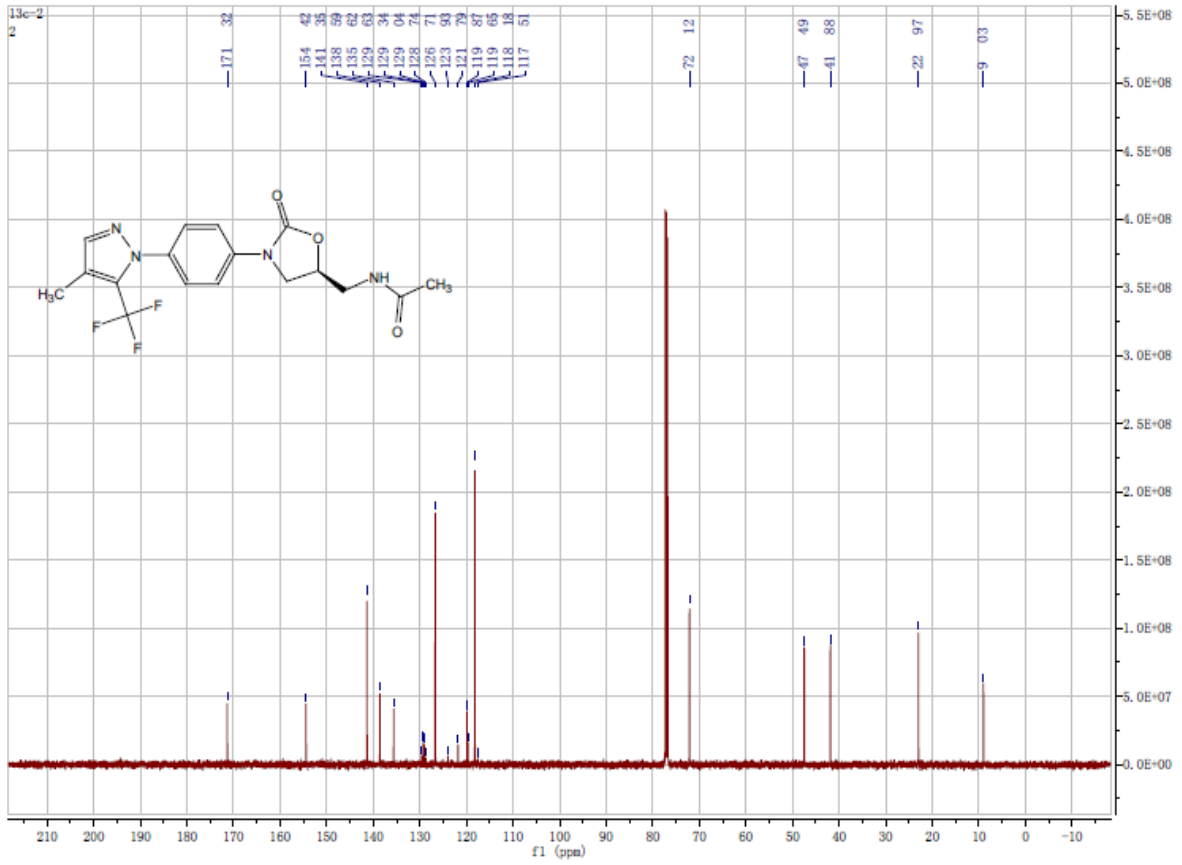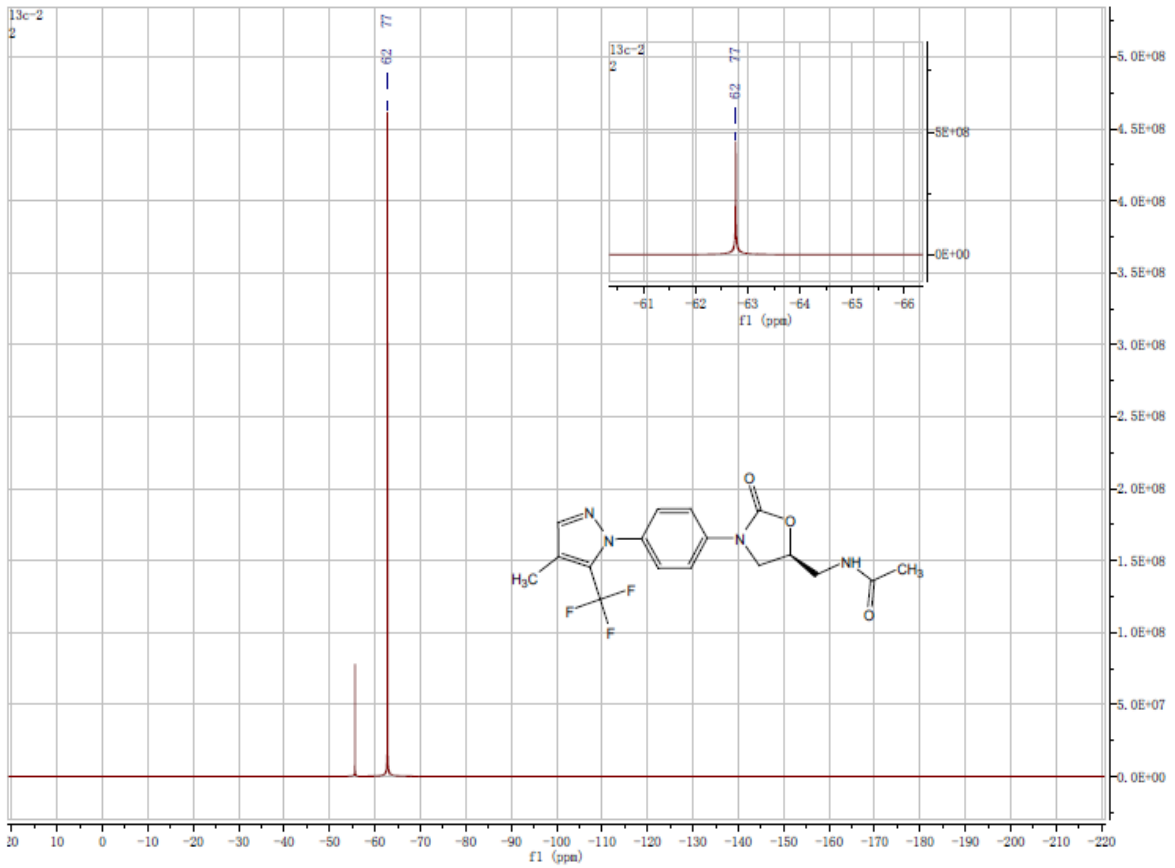

HRMS, <sup>1</sup>H NMR, <sup>13</sup>C NMR and <sup>19</sup>F NMR spectra of **13d**

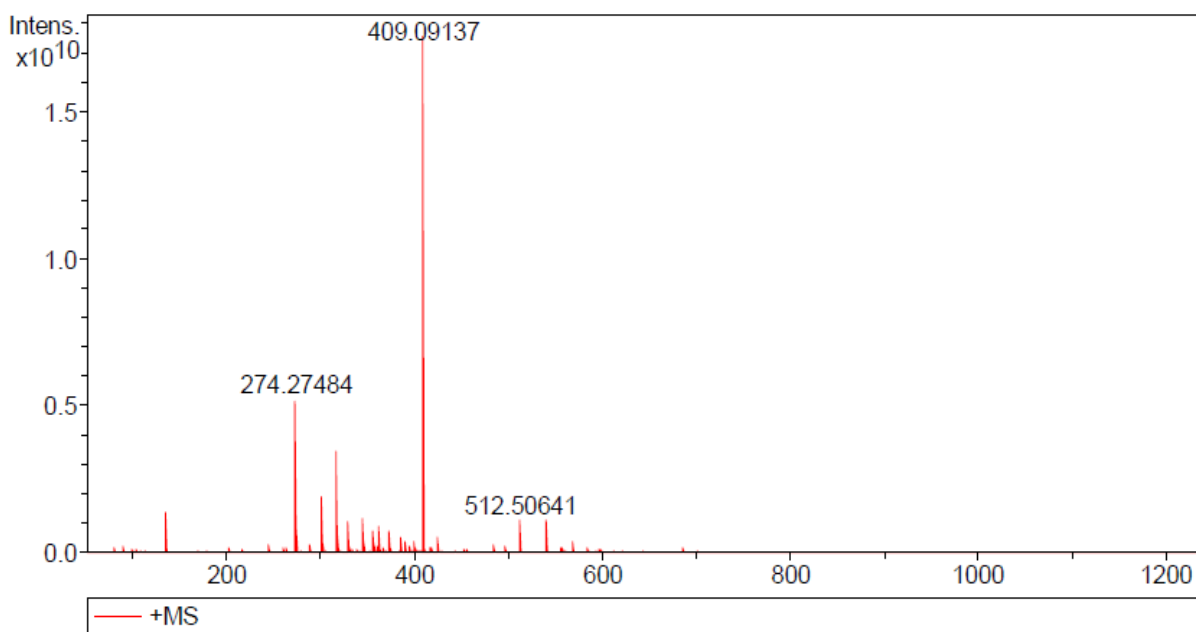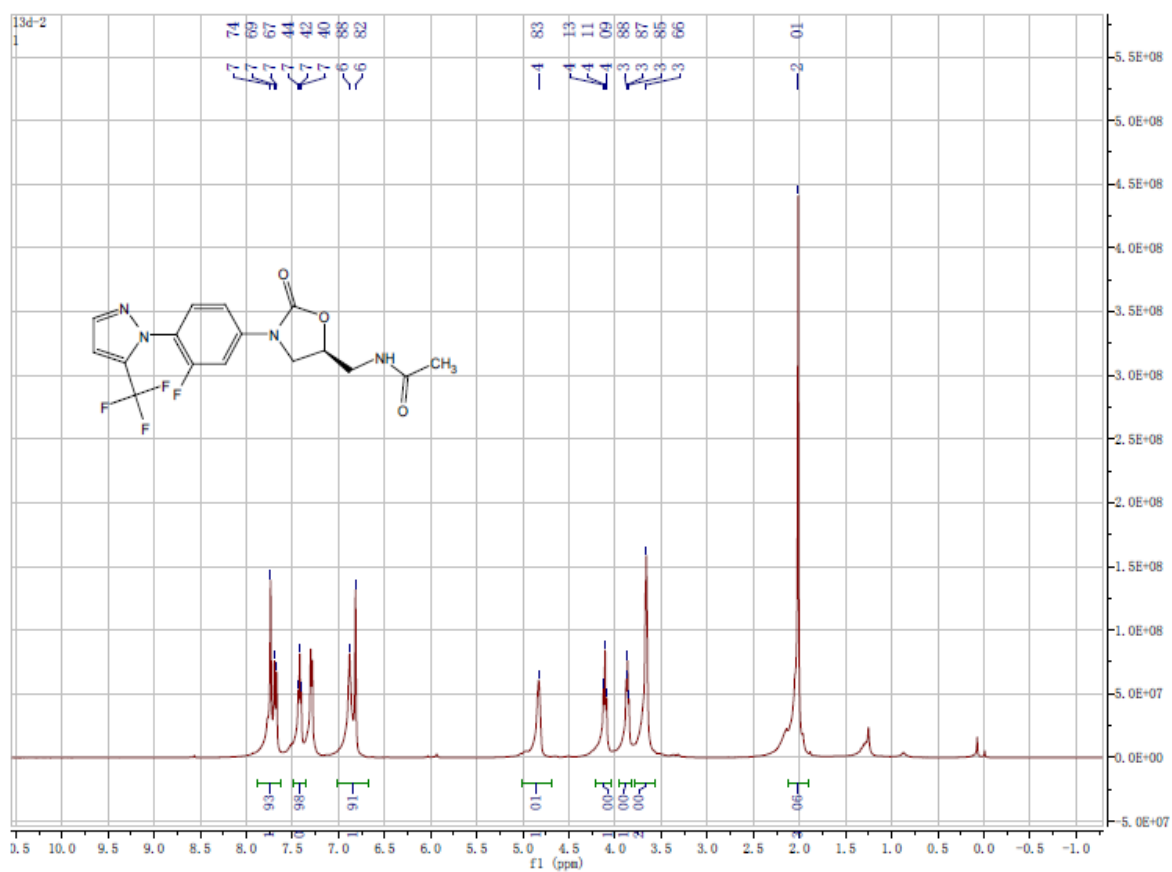



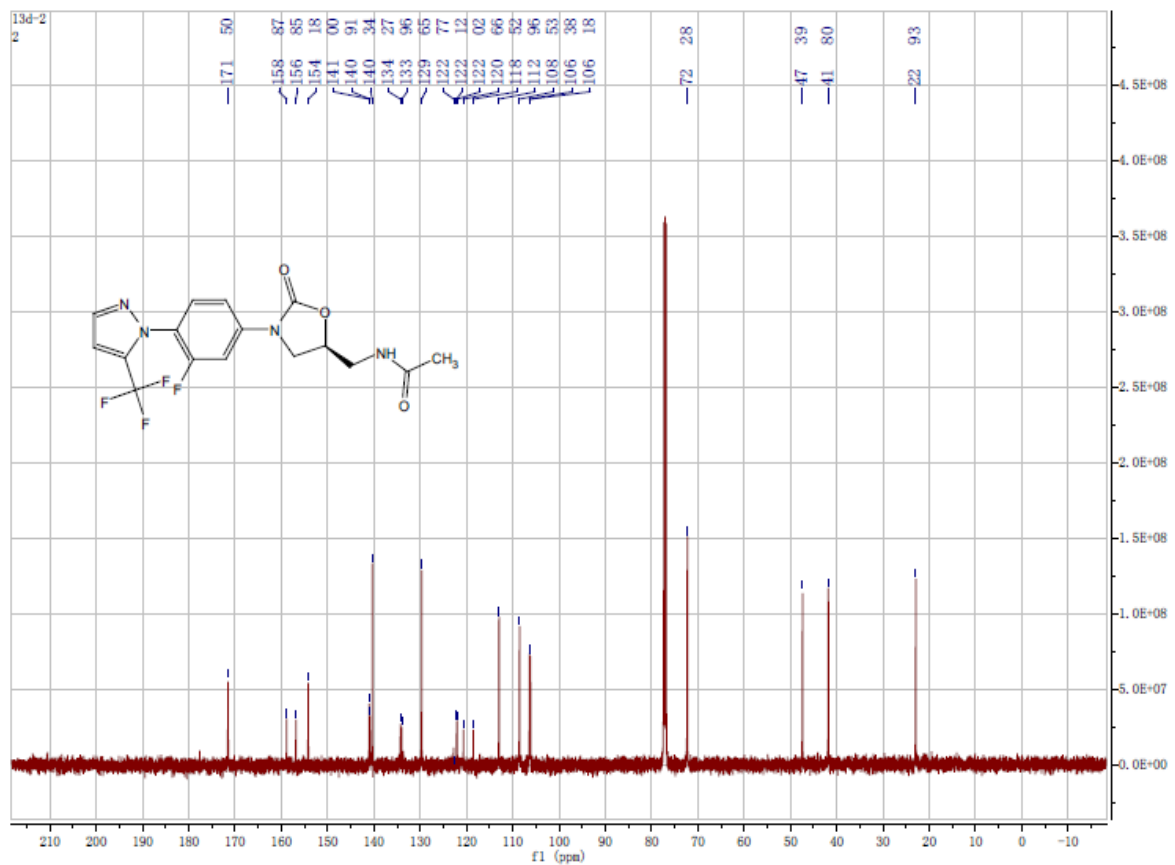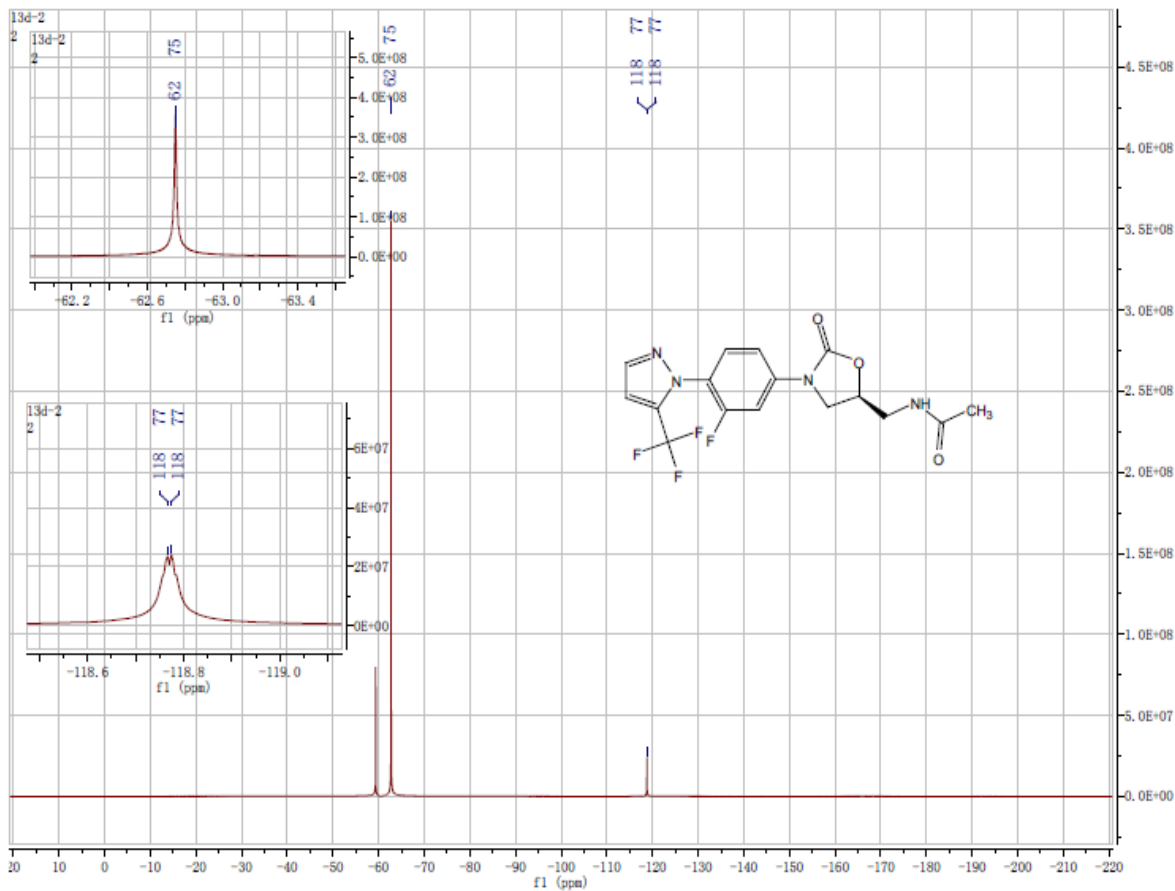

HRMS, <sup>1</sup>H NMR, <sup>13</sup>C NMR and <sup>19</sup>F NMR spectra of **13e**

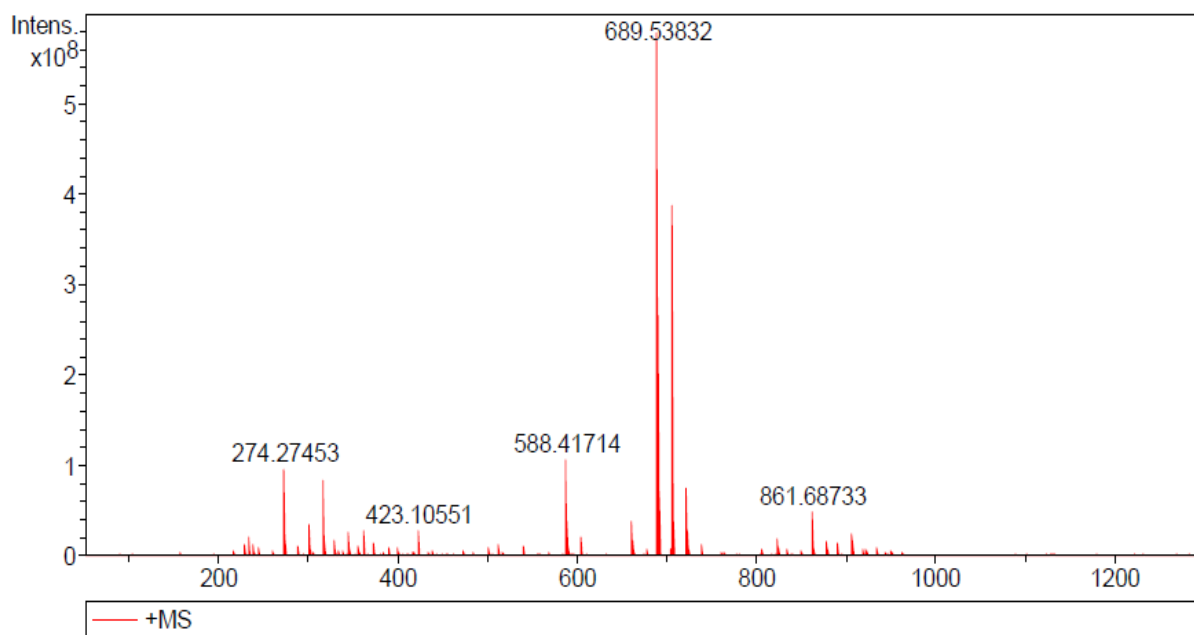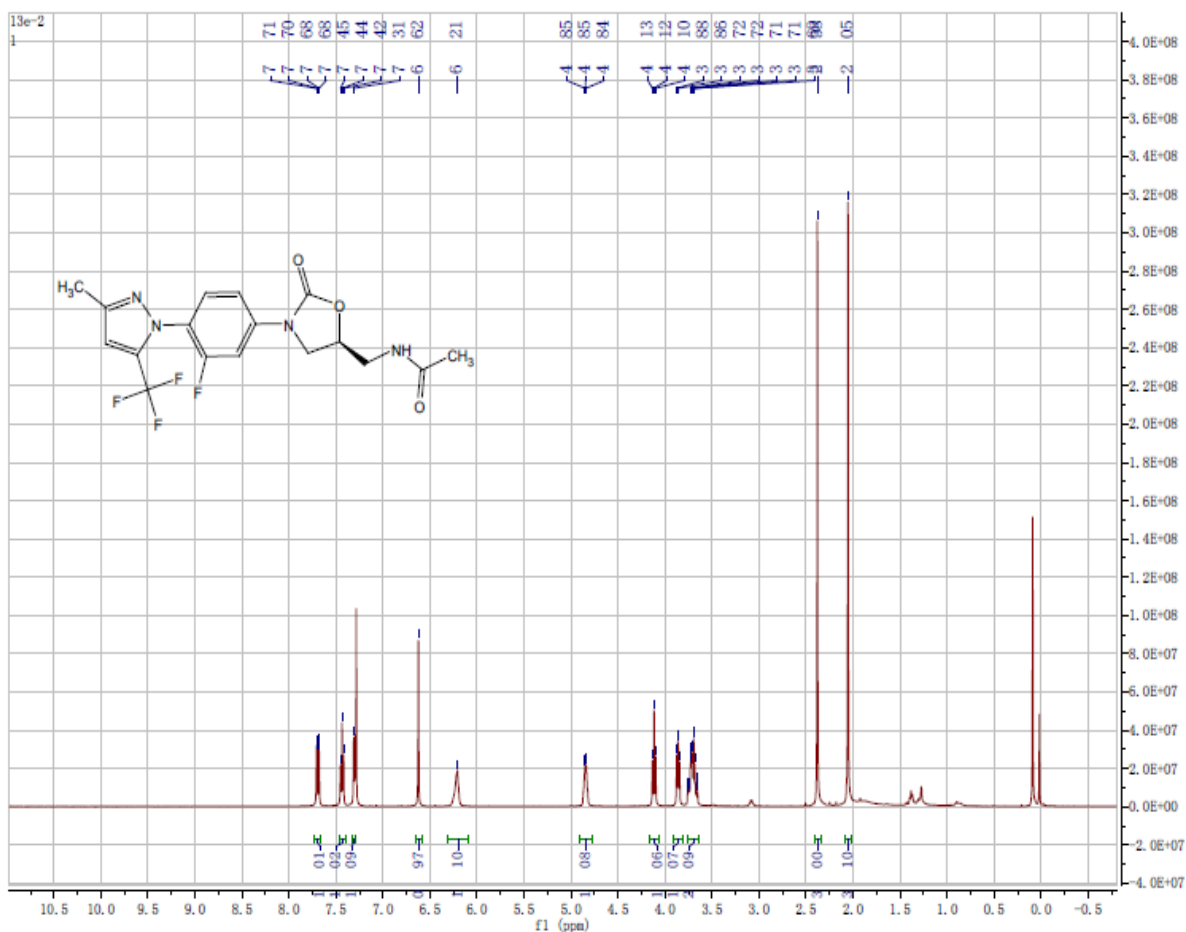

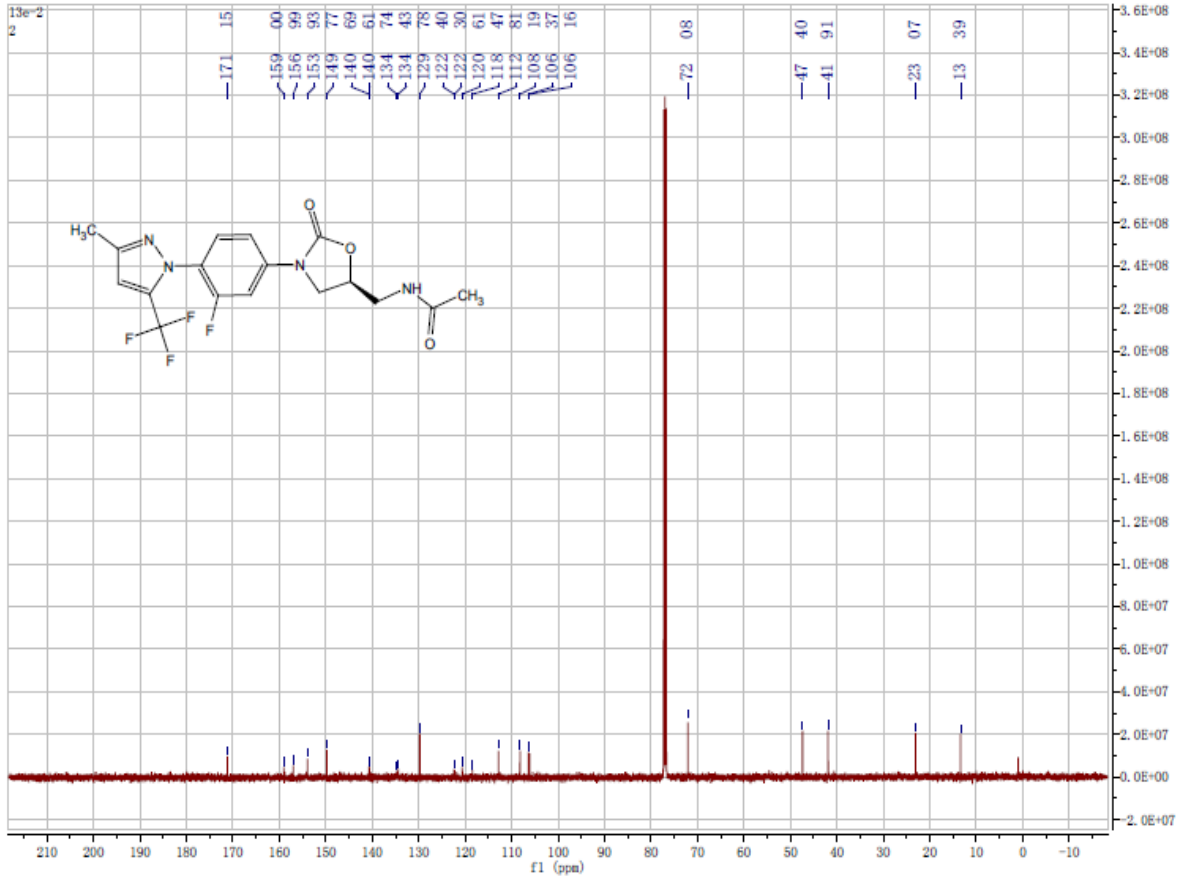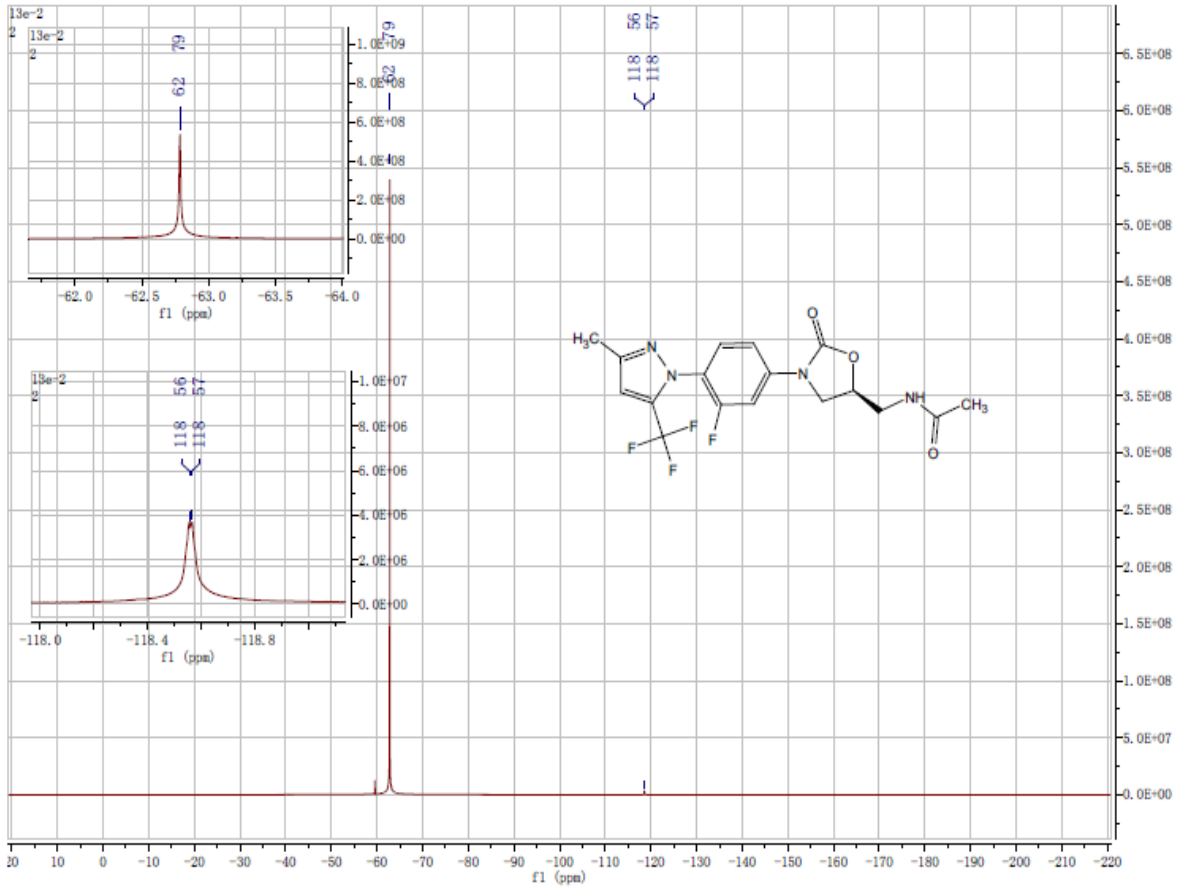

HRMS, <sup>1</sup>H NMR, <sup>13</sup>C NMR and <sup>19</sup>F NMR spectra of **13f**

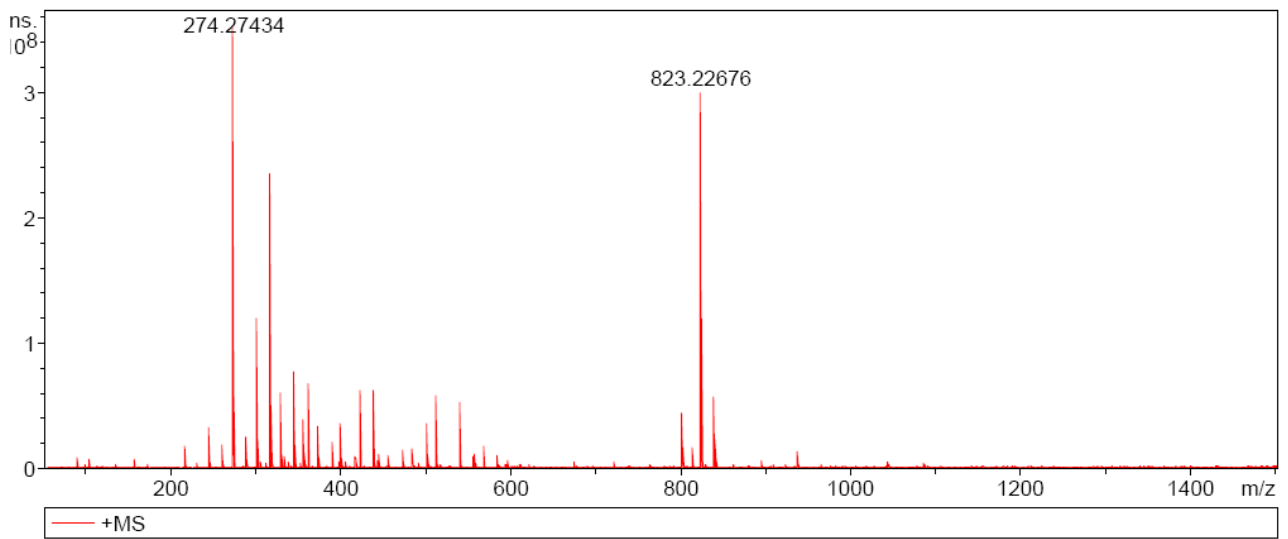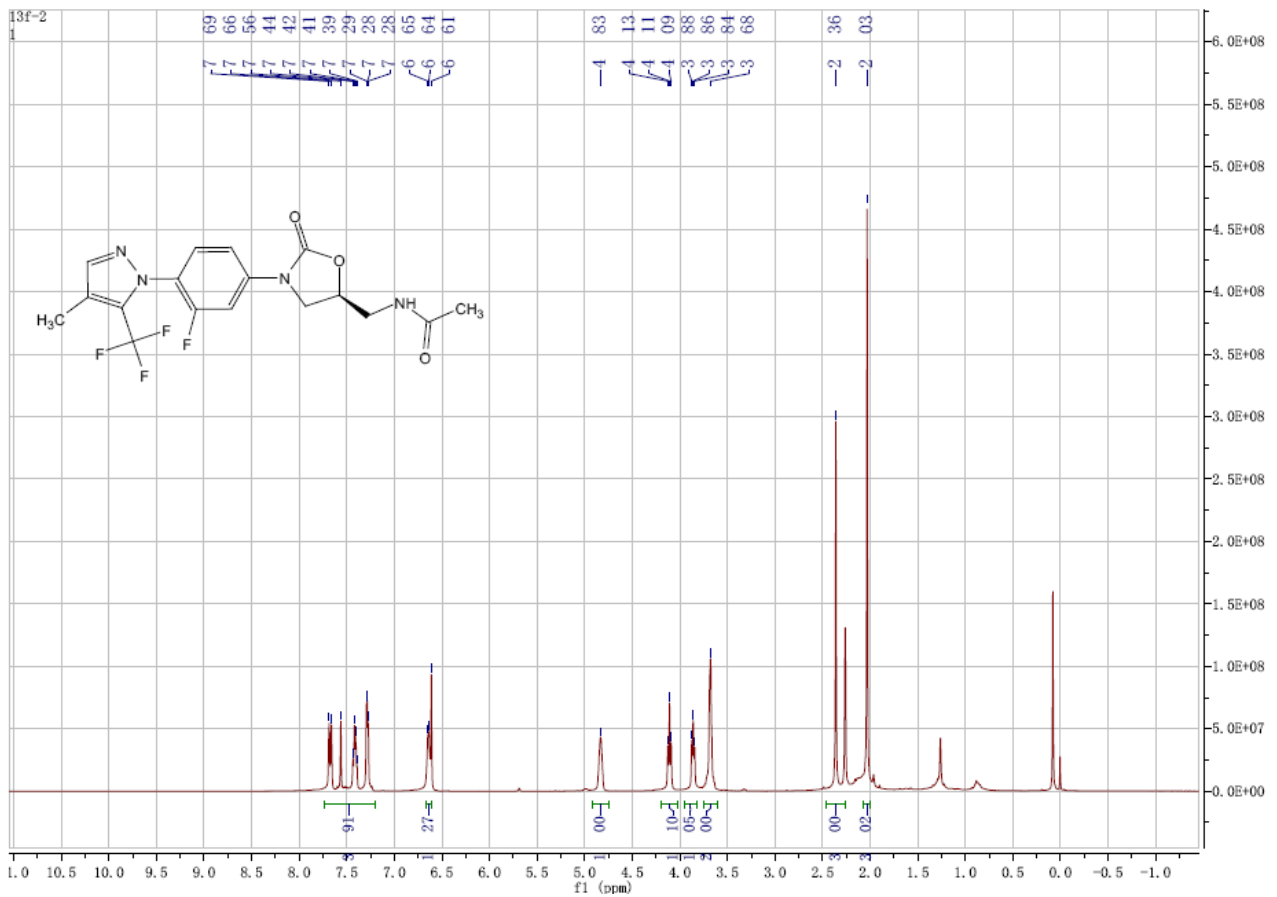

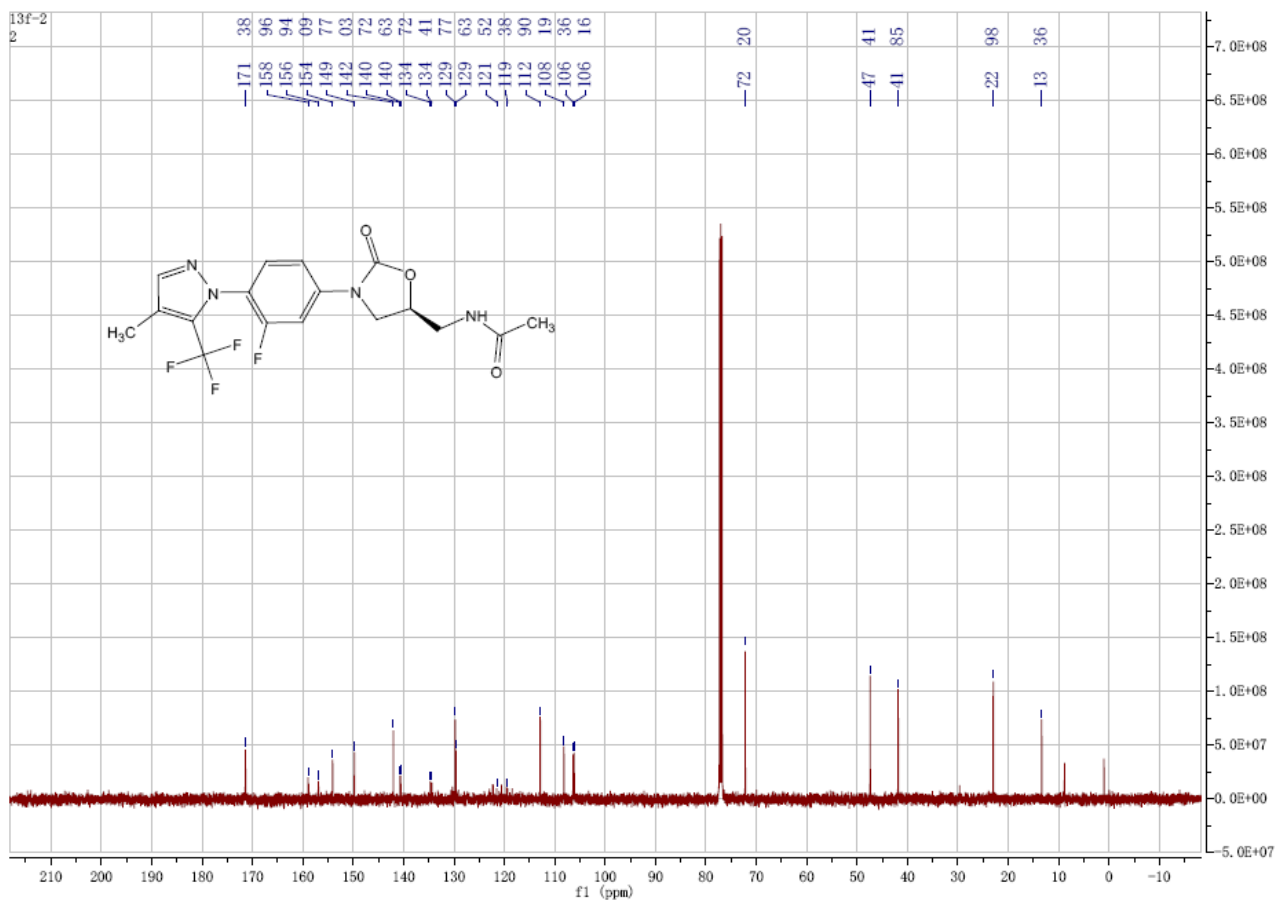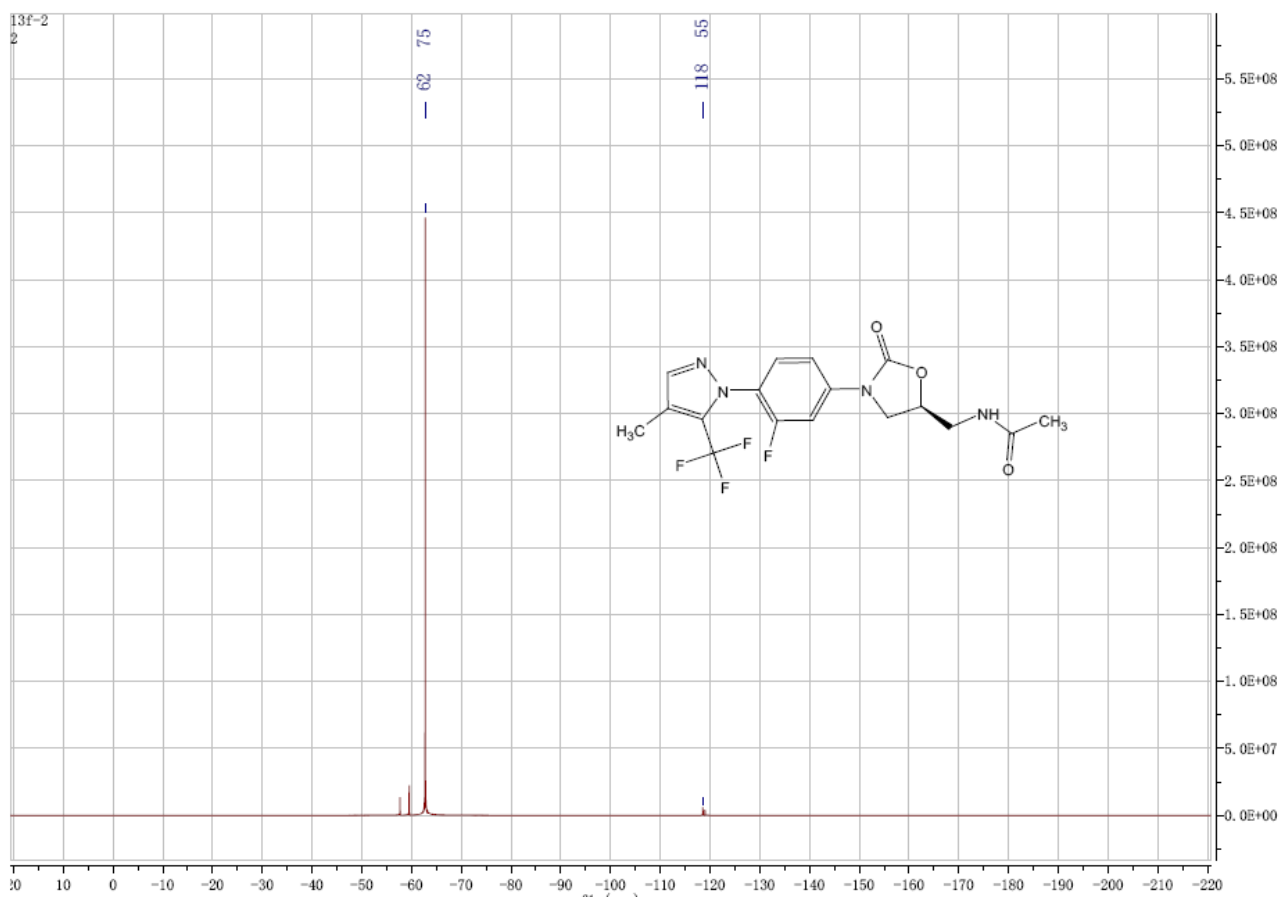

HRMS, <sup>1</sup>H NMR, <sup>13</sup>C NMR and <sup>19</sup>F NMR spectra of **13g**

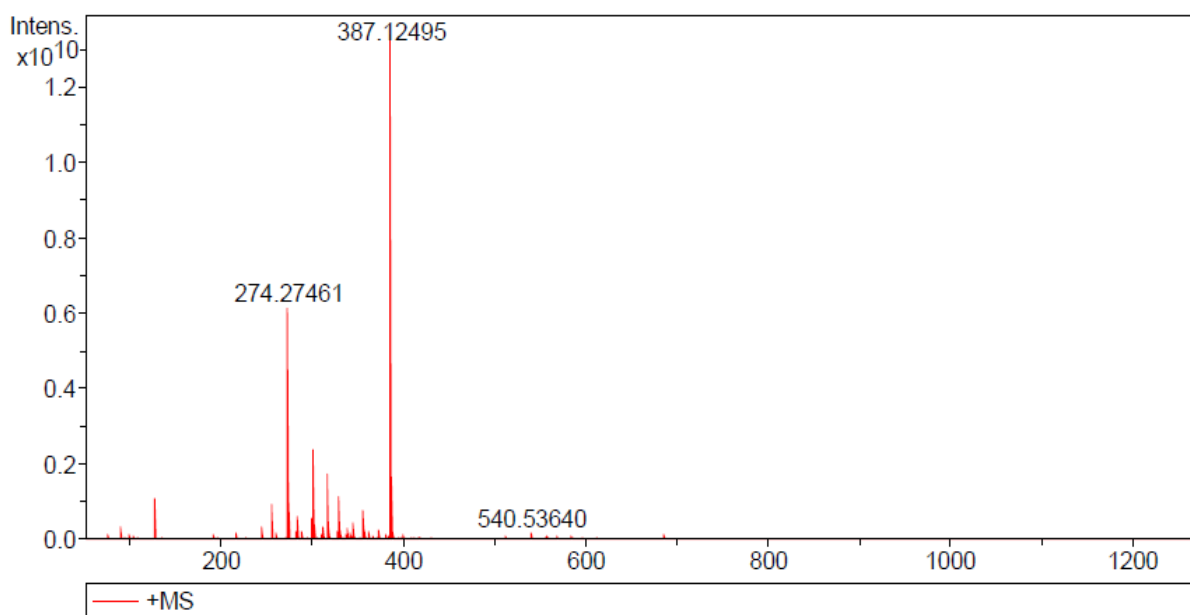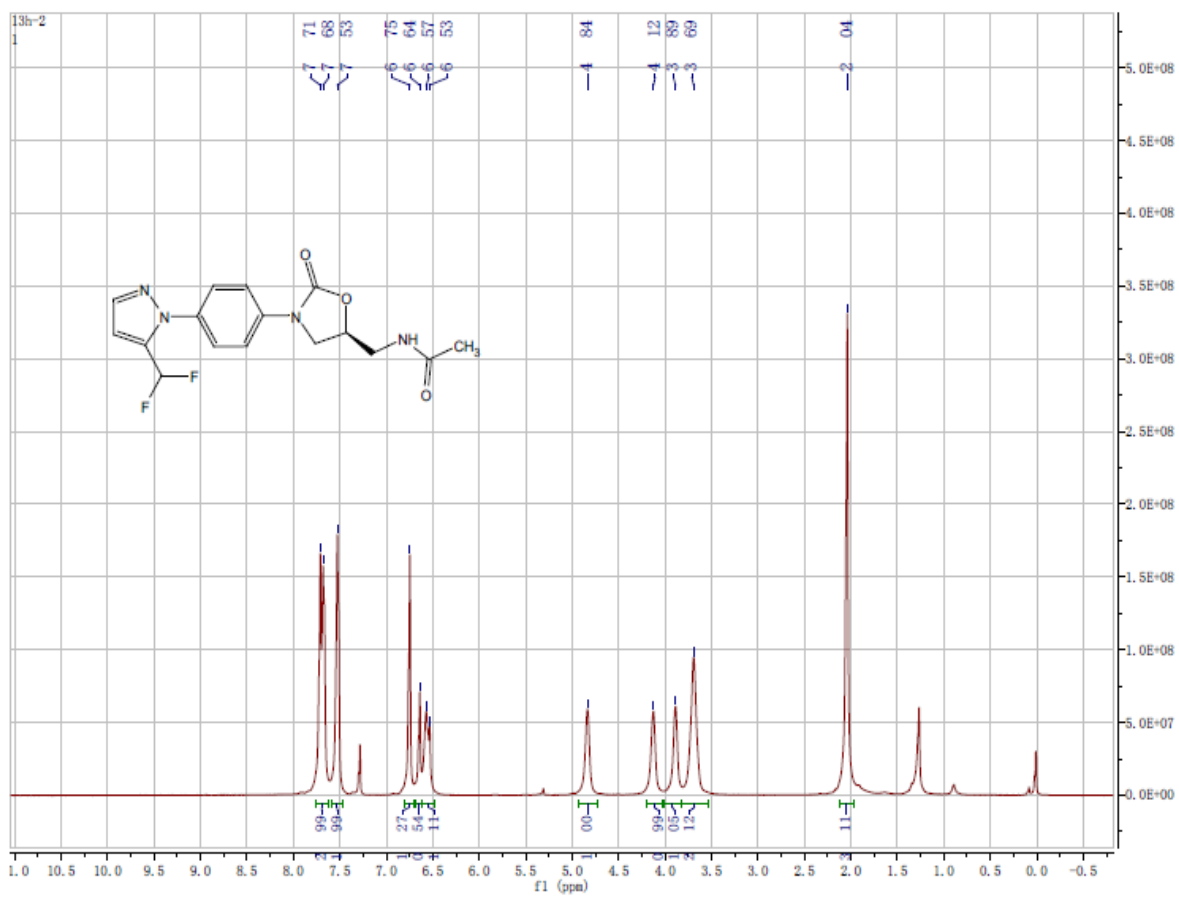

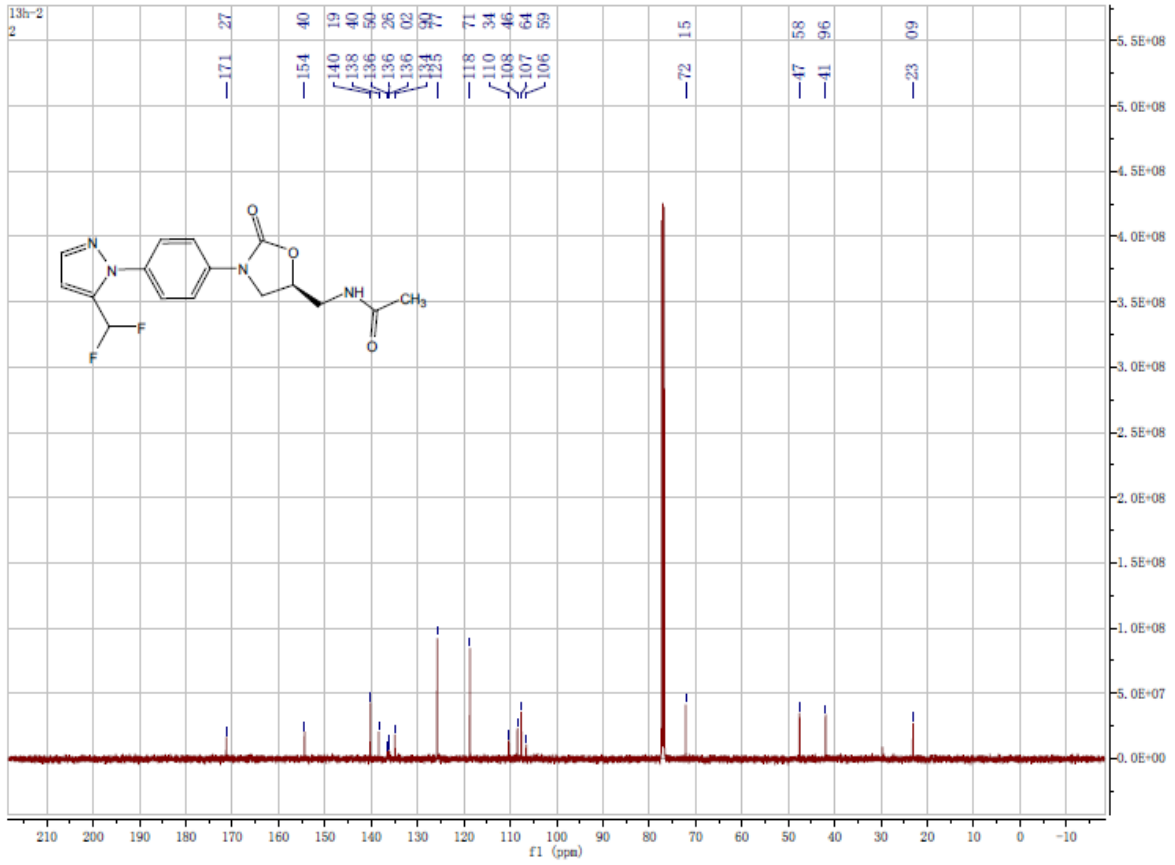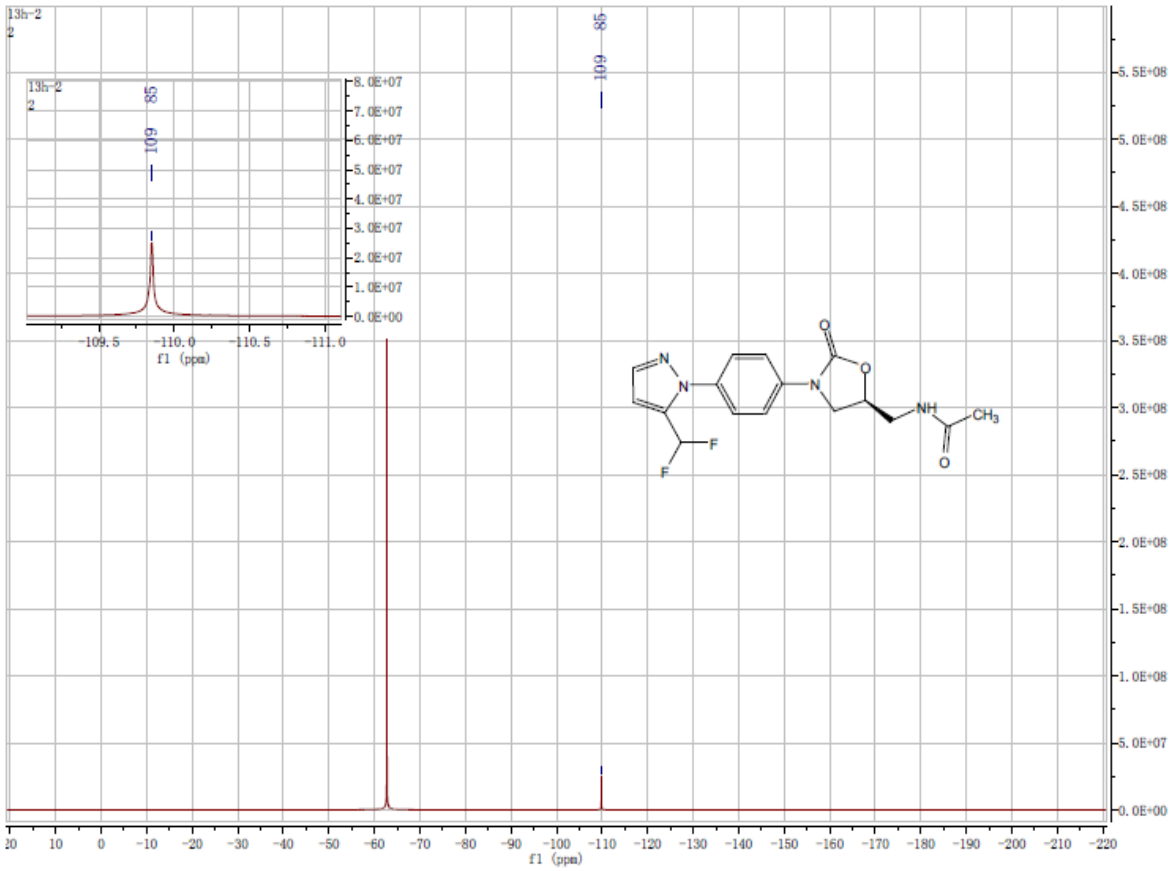

HRMS, <sup>1</sup>H NMR, <sup>13</sup>C NMR and <sup>19</sup>F NMR spectra of **13h**

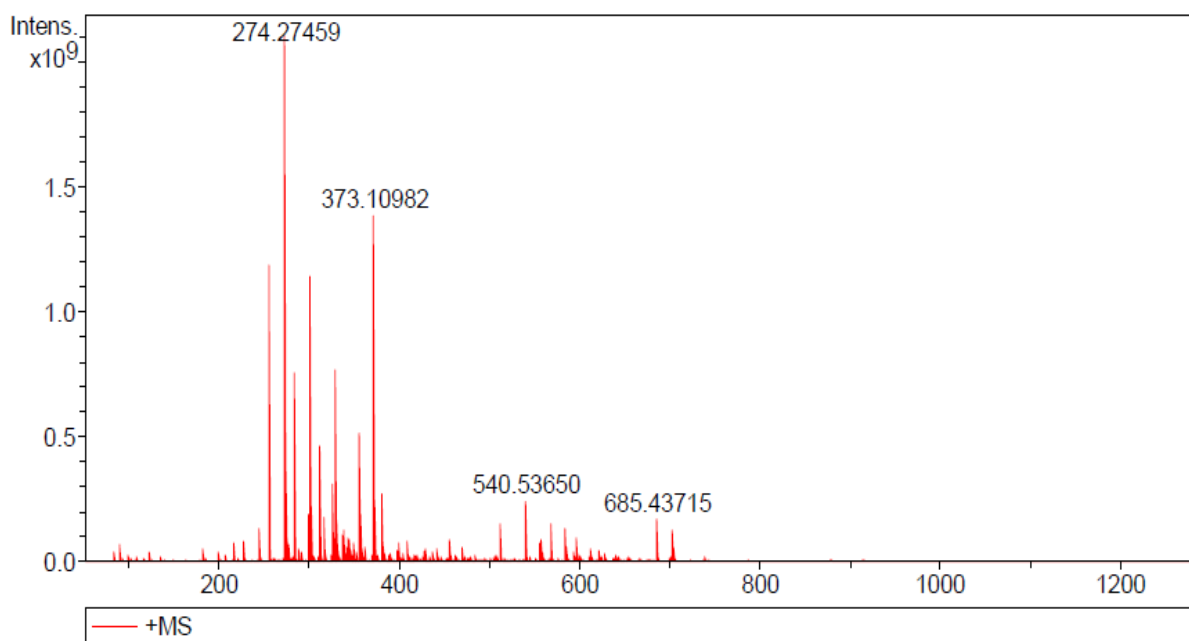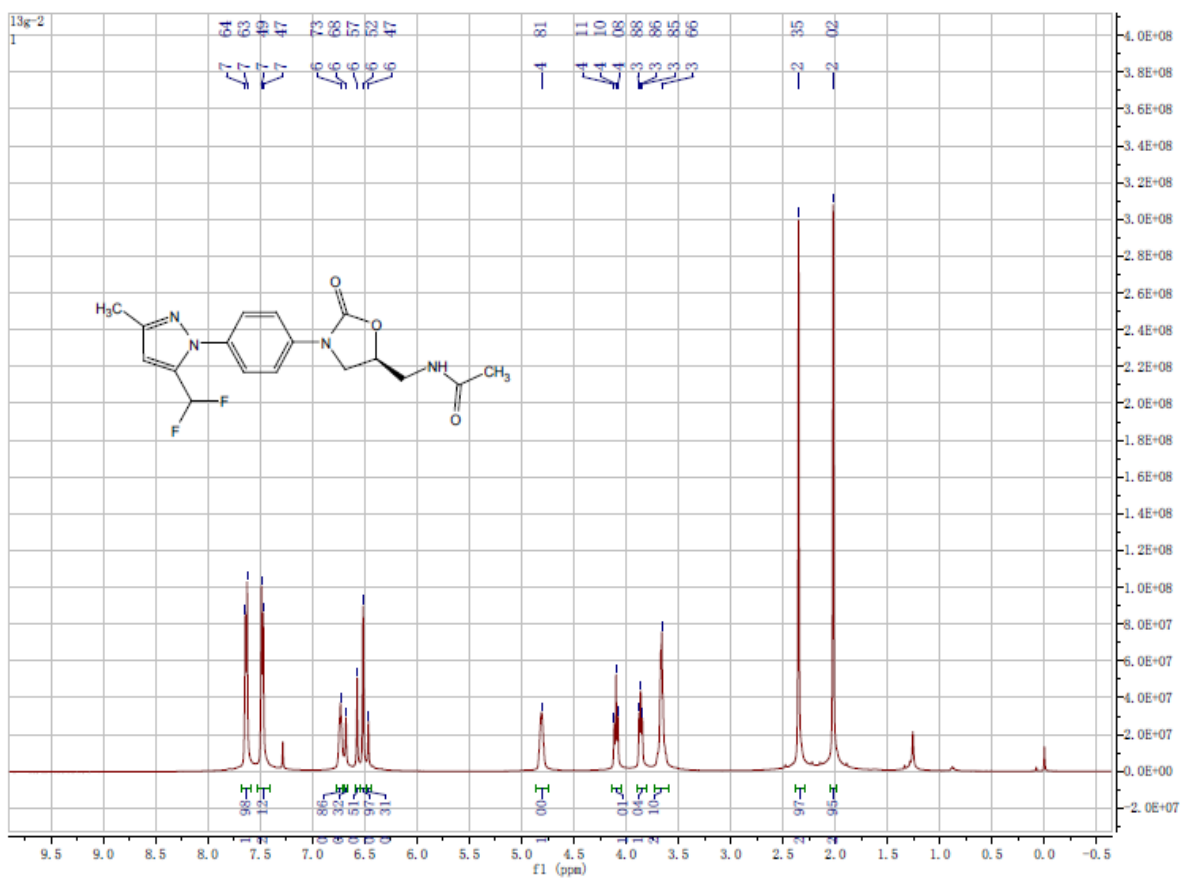



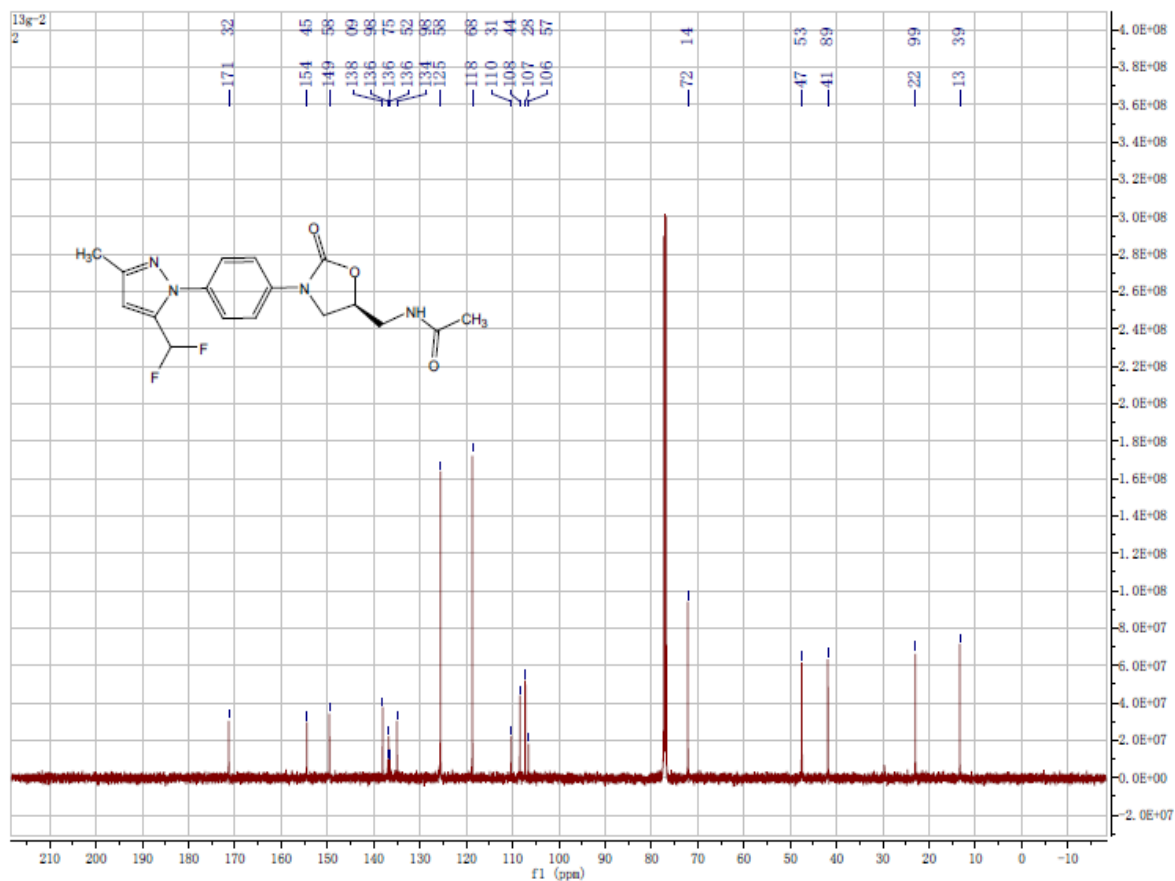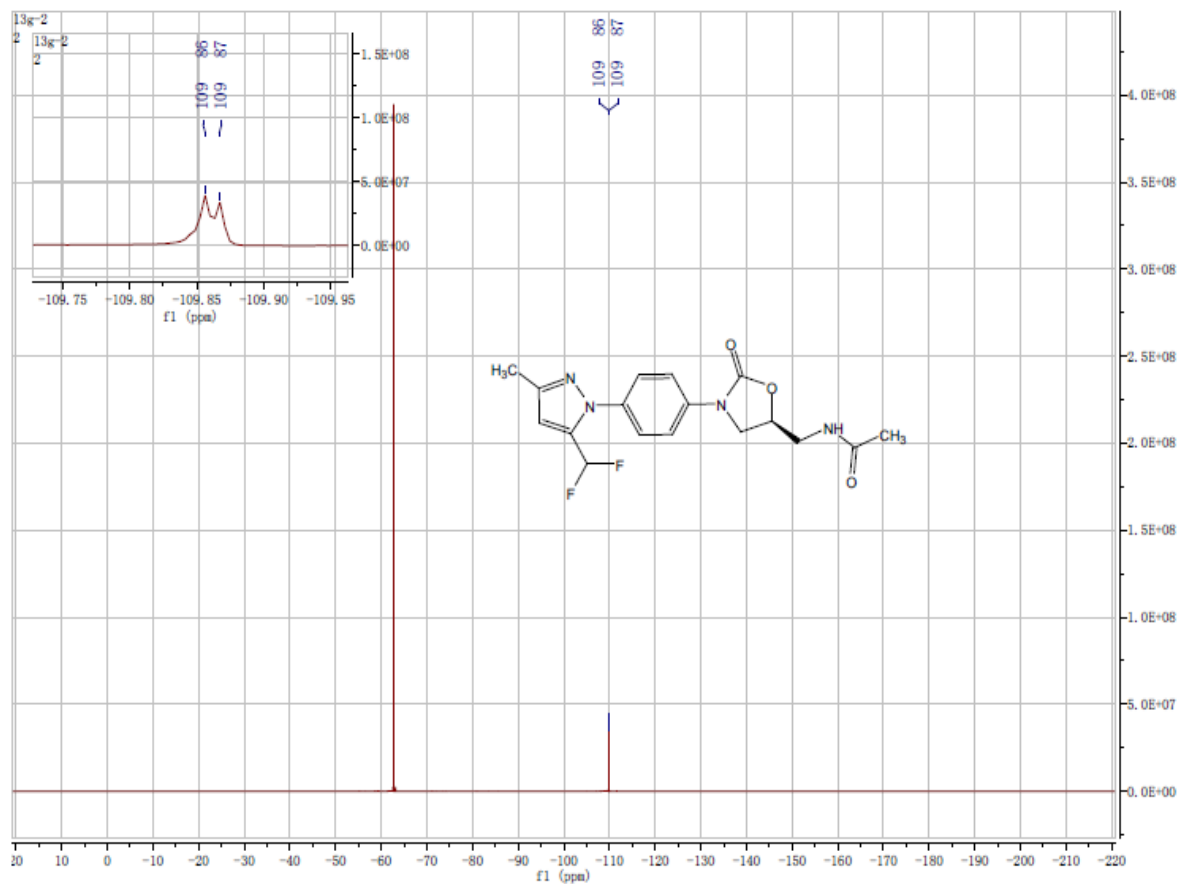

HRMS, <sup>1</sup>H NMR, <sup>13</sup>C NMR and <sup>19</sup>F NMR spectra of **13i**

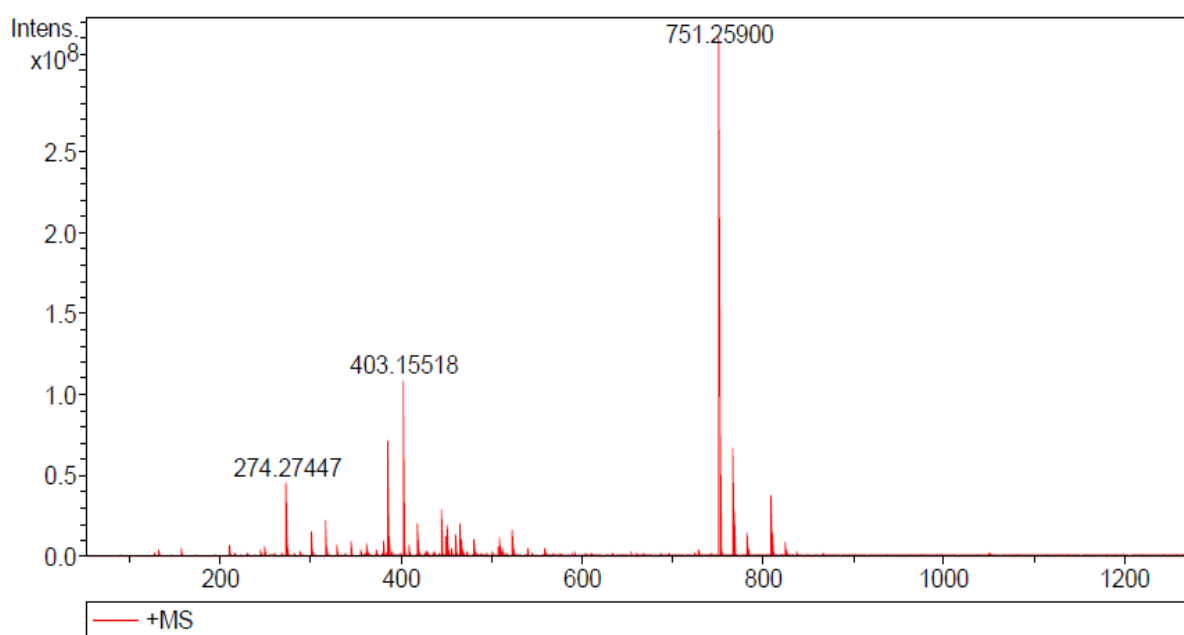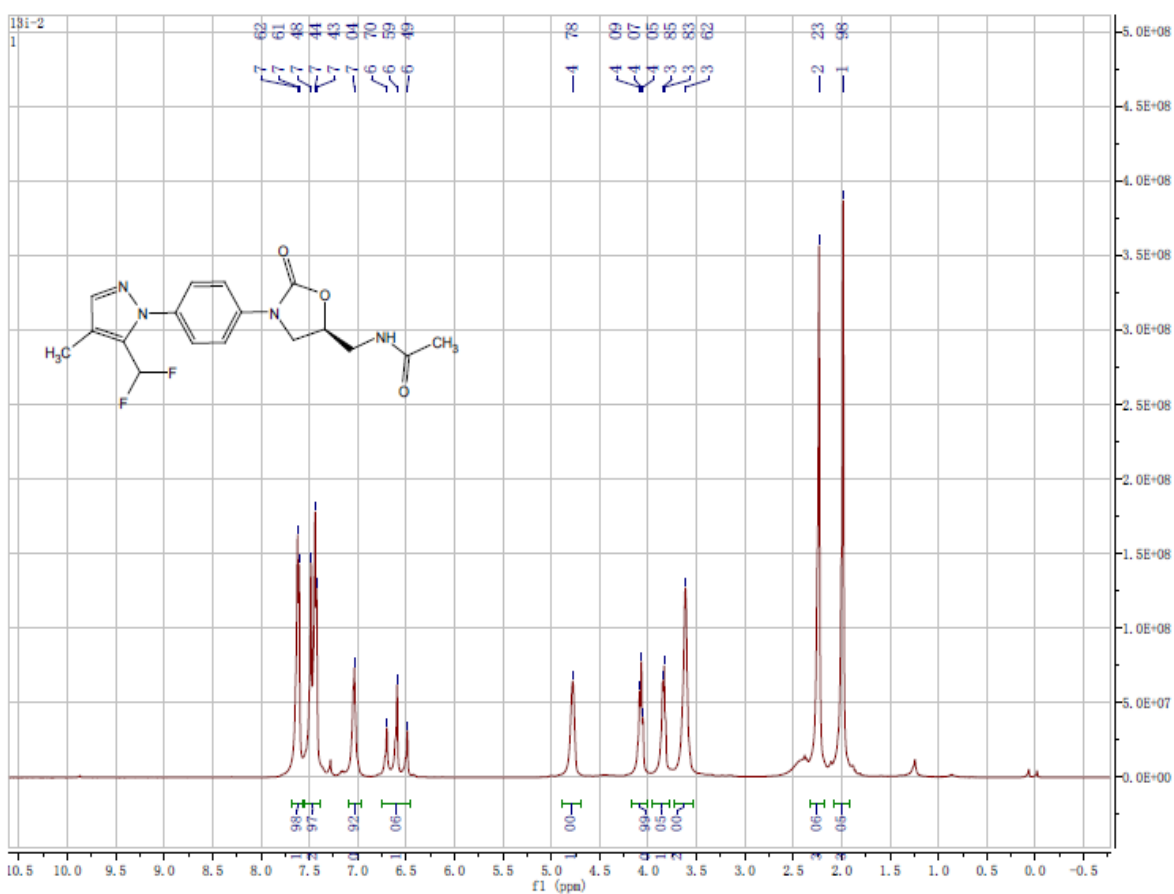

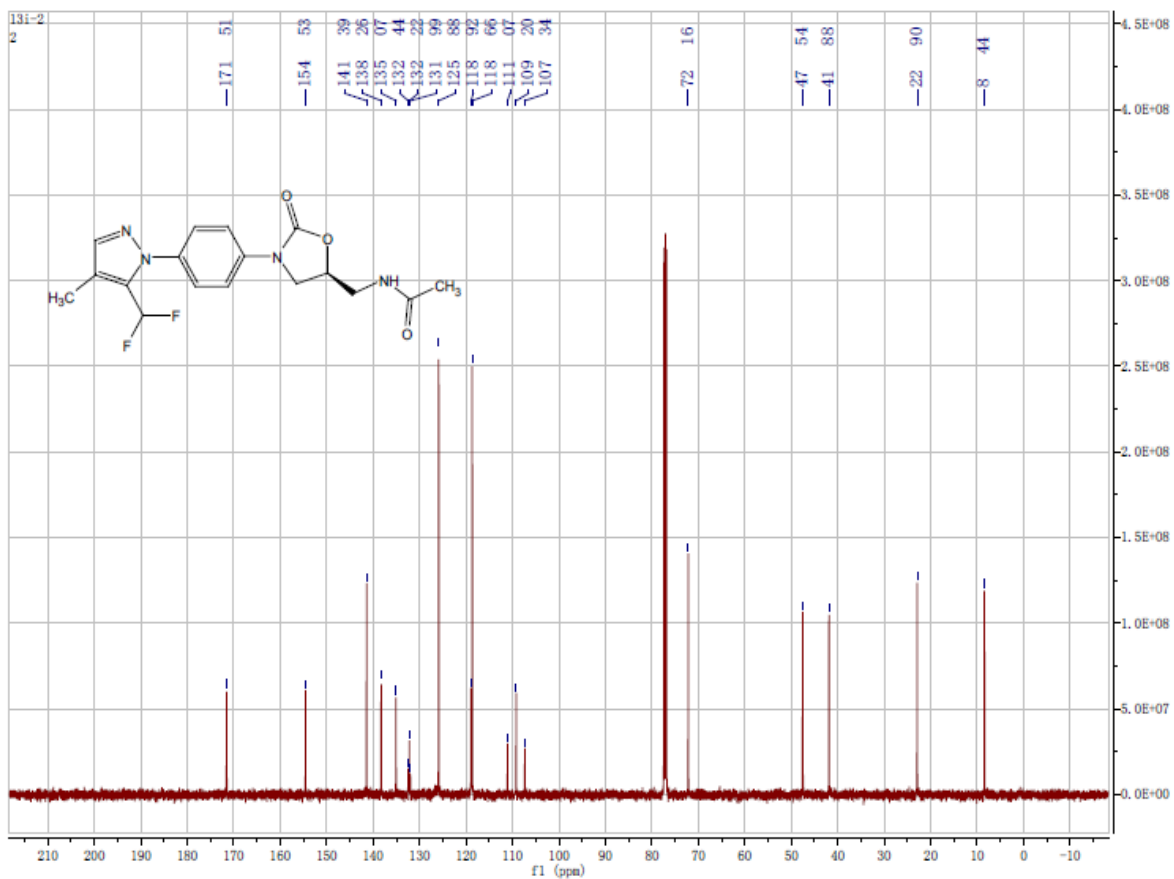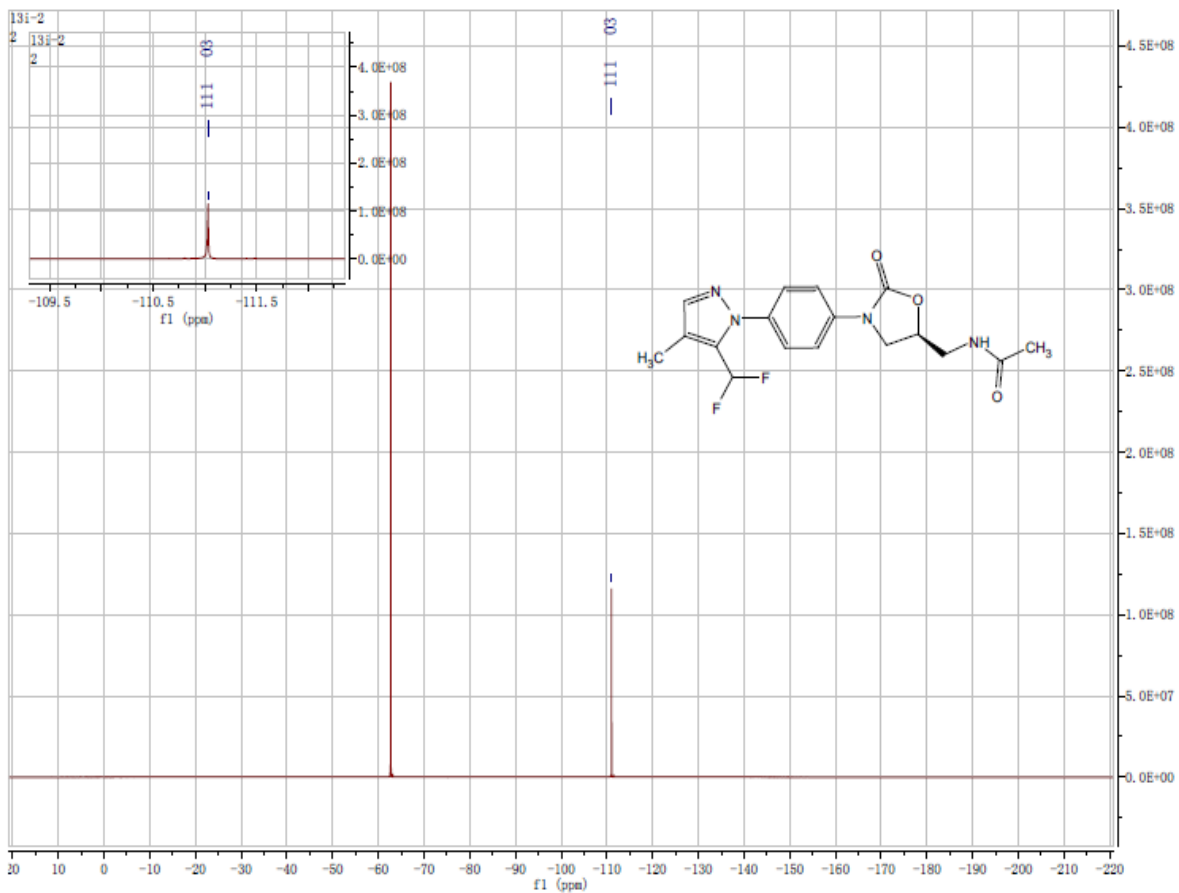

HRMS, <sup>1</sup>H NMR, <sup>13</sup>C NMR and <sup>19</sup>F NMR spectra of **13j**

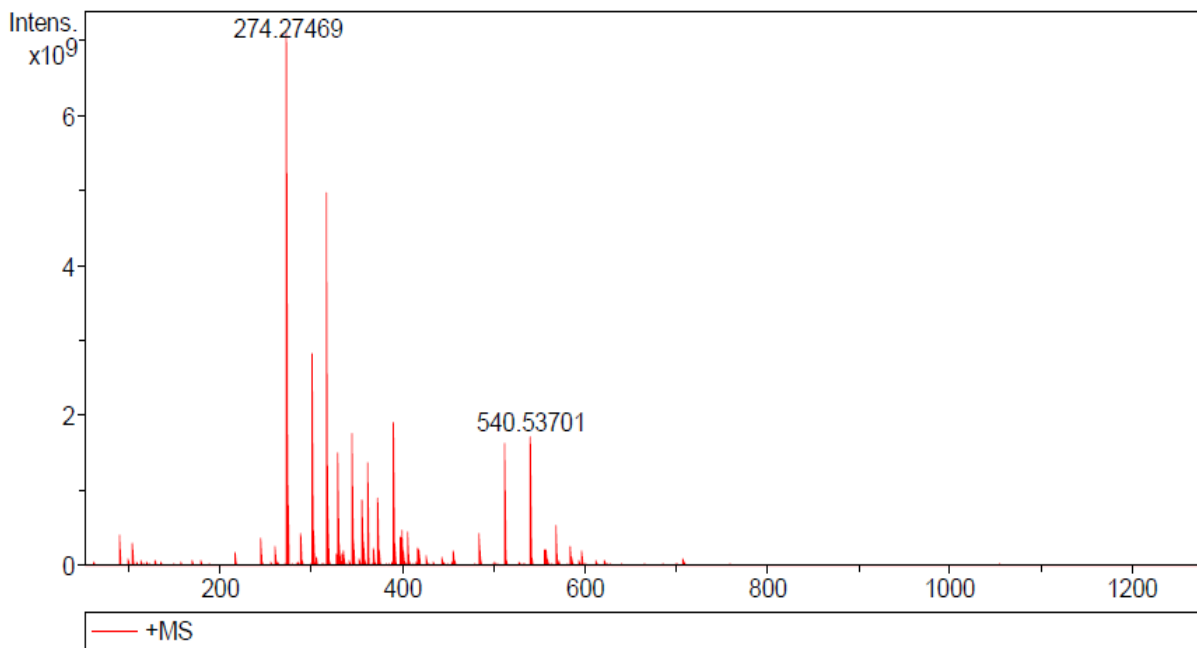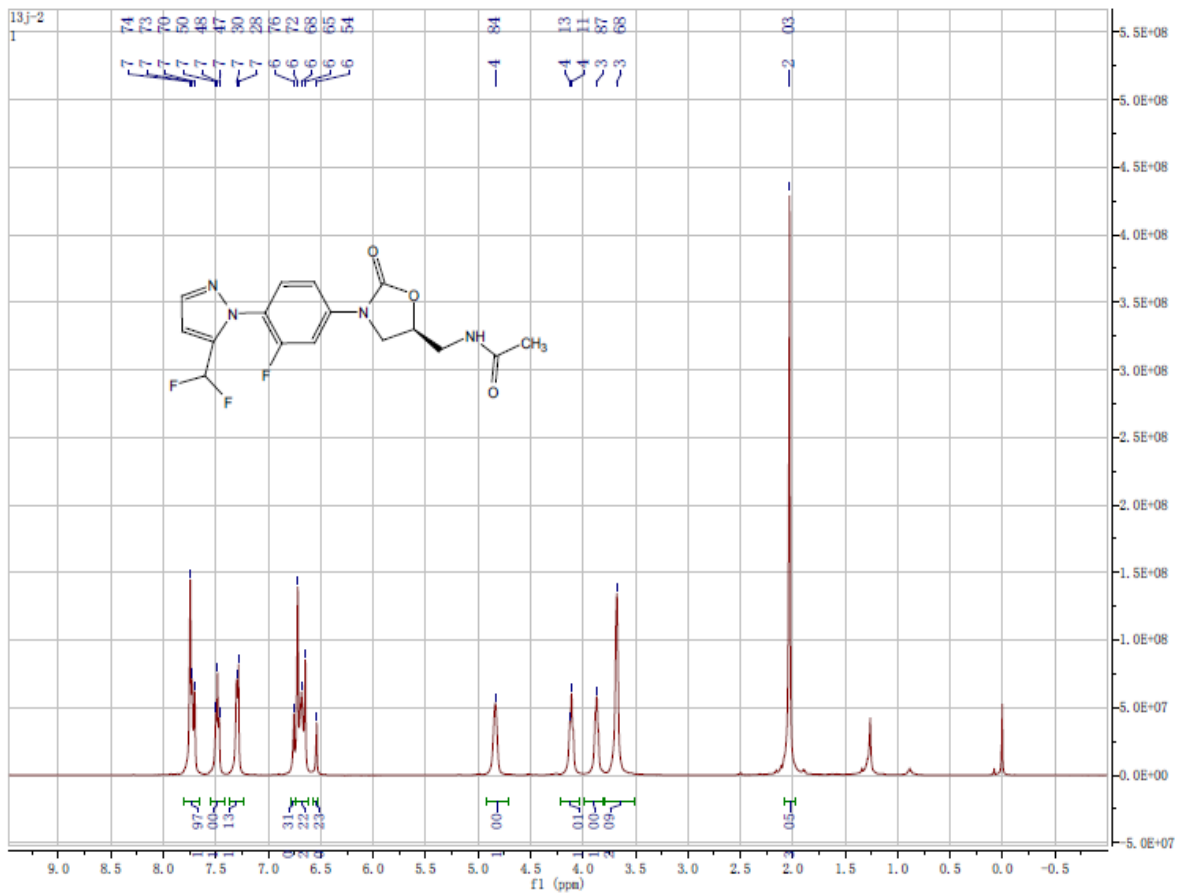

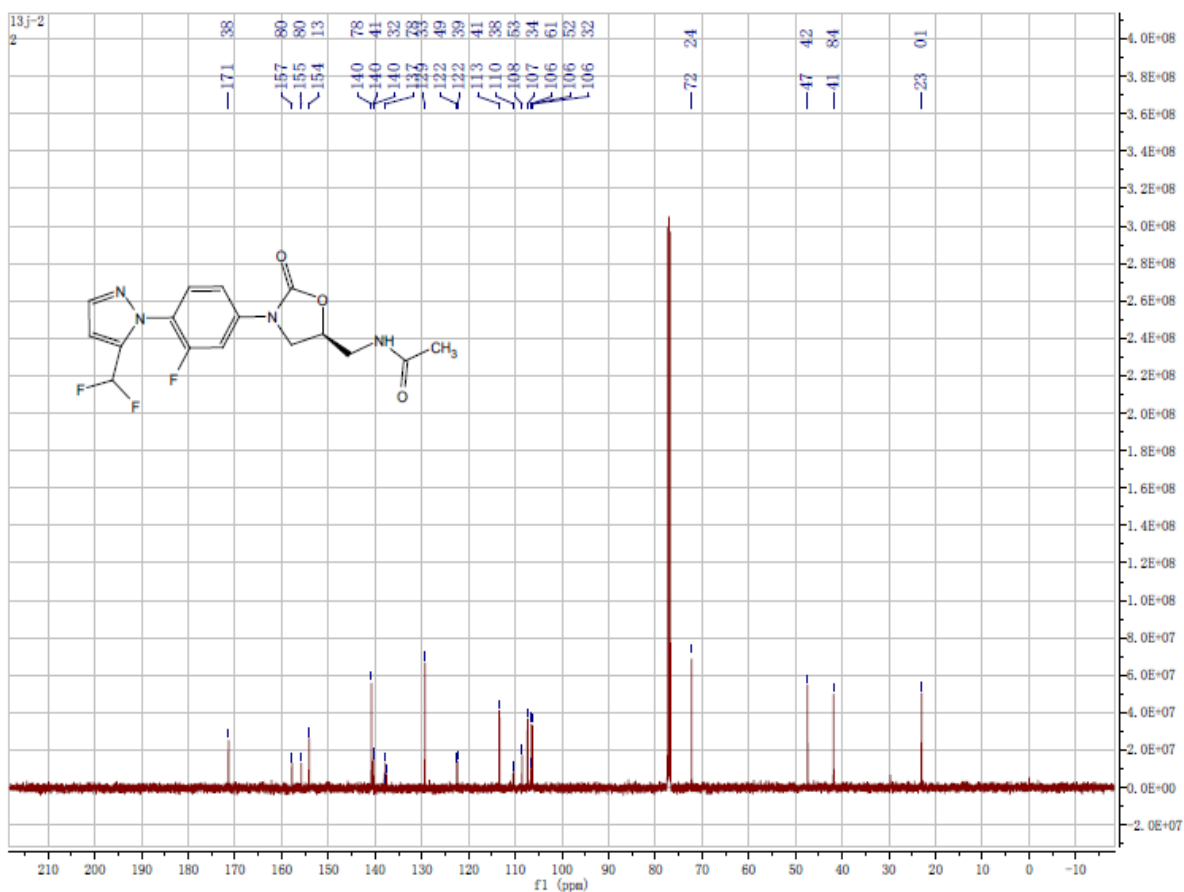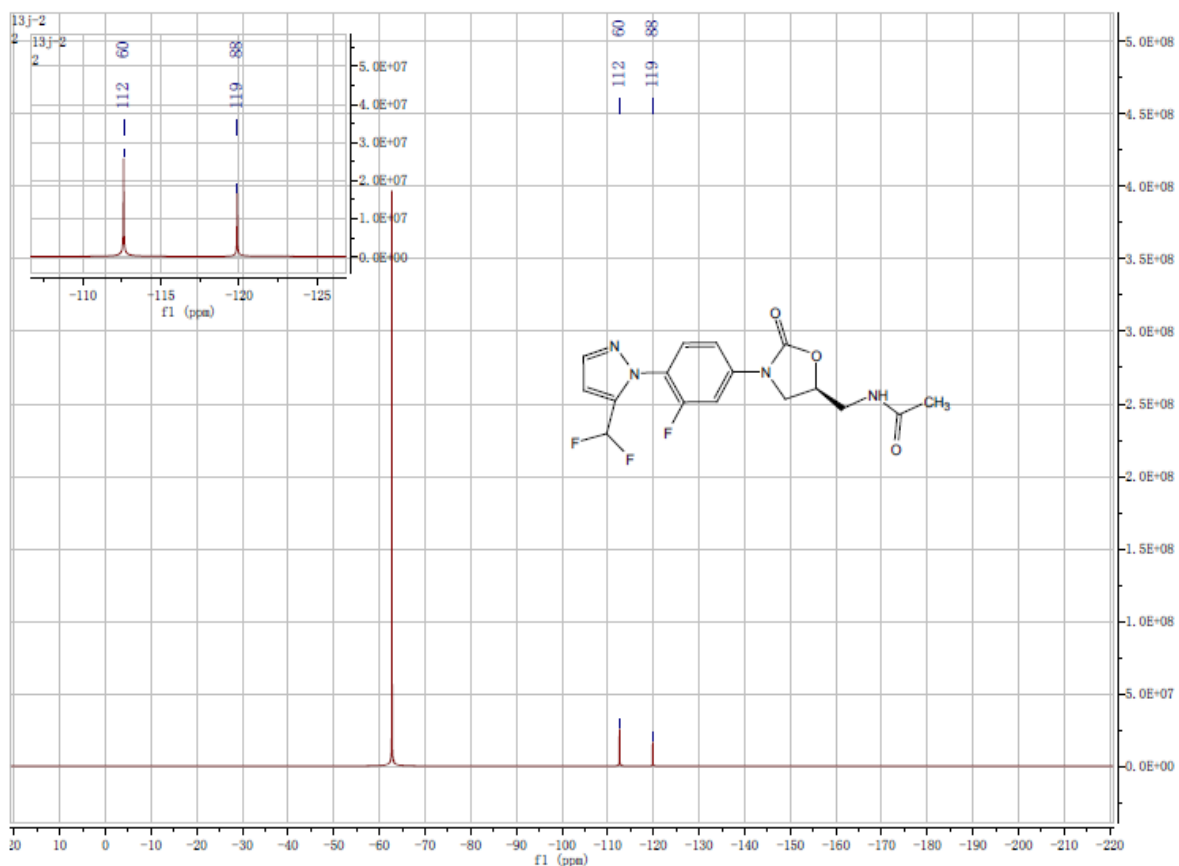

HRMS, <sup>1</sup>H NMR, <sup>13</sup>C NMR and <sup>19</sup>F NMR spectra of **13k**

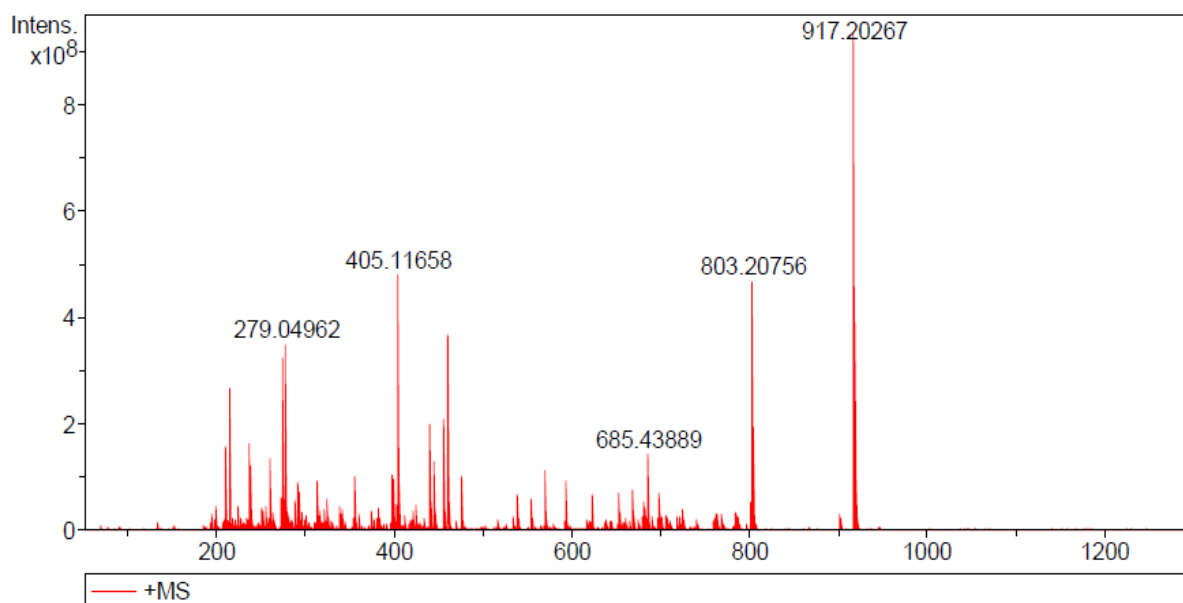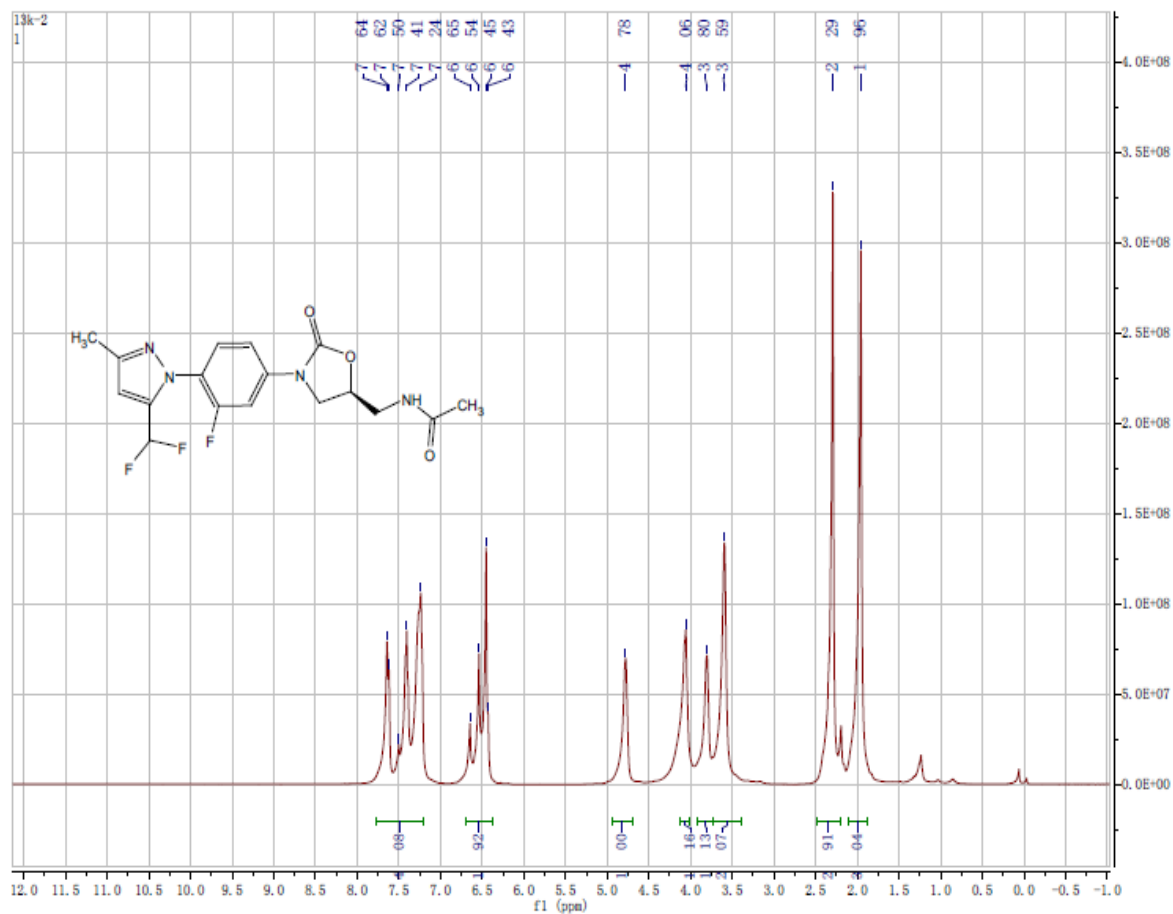

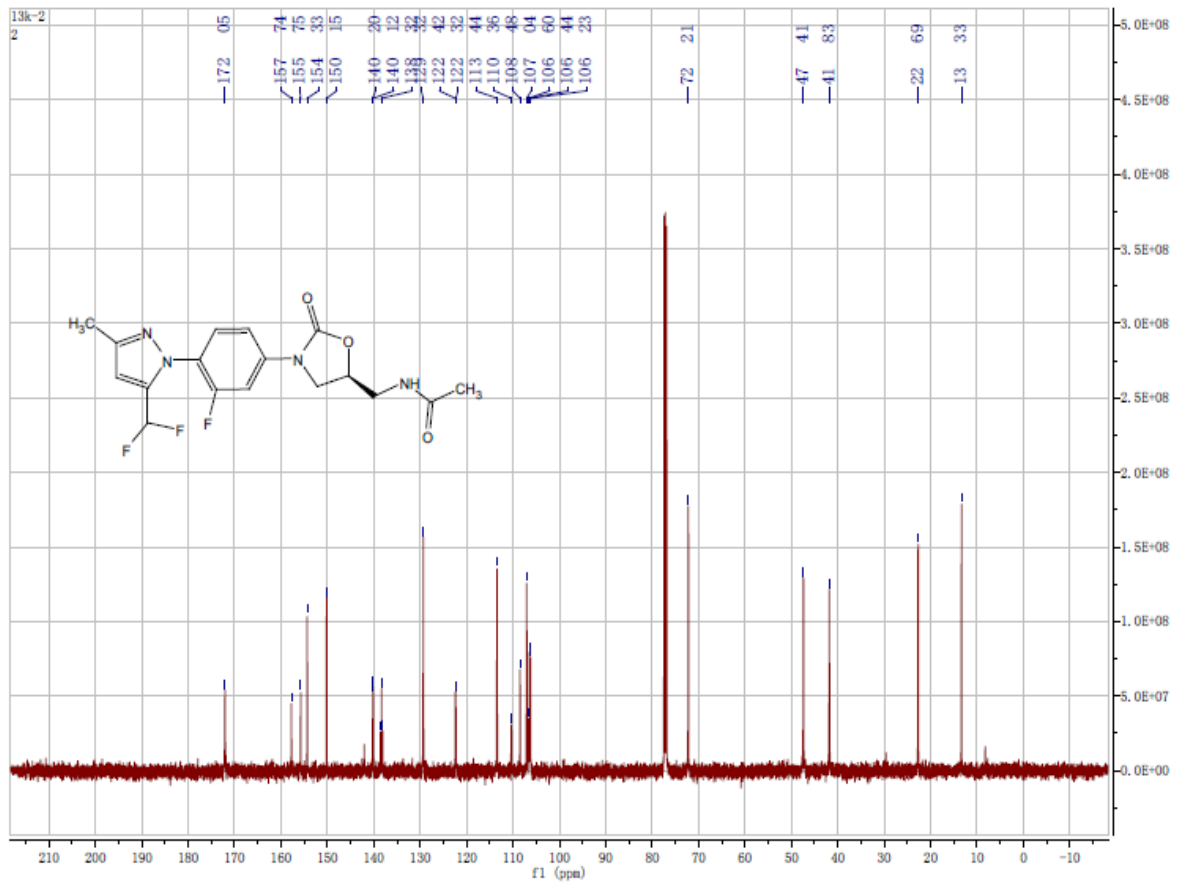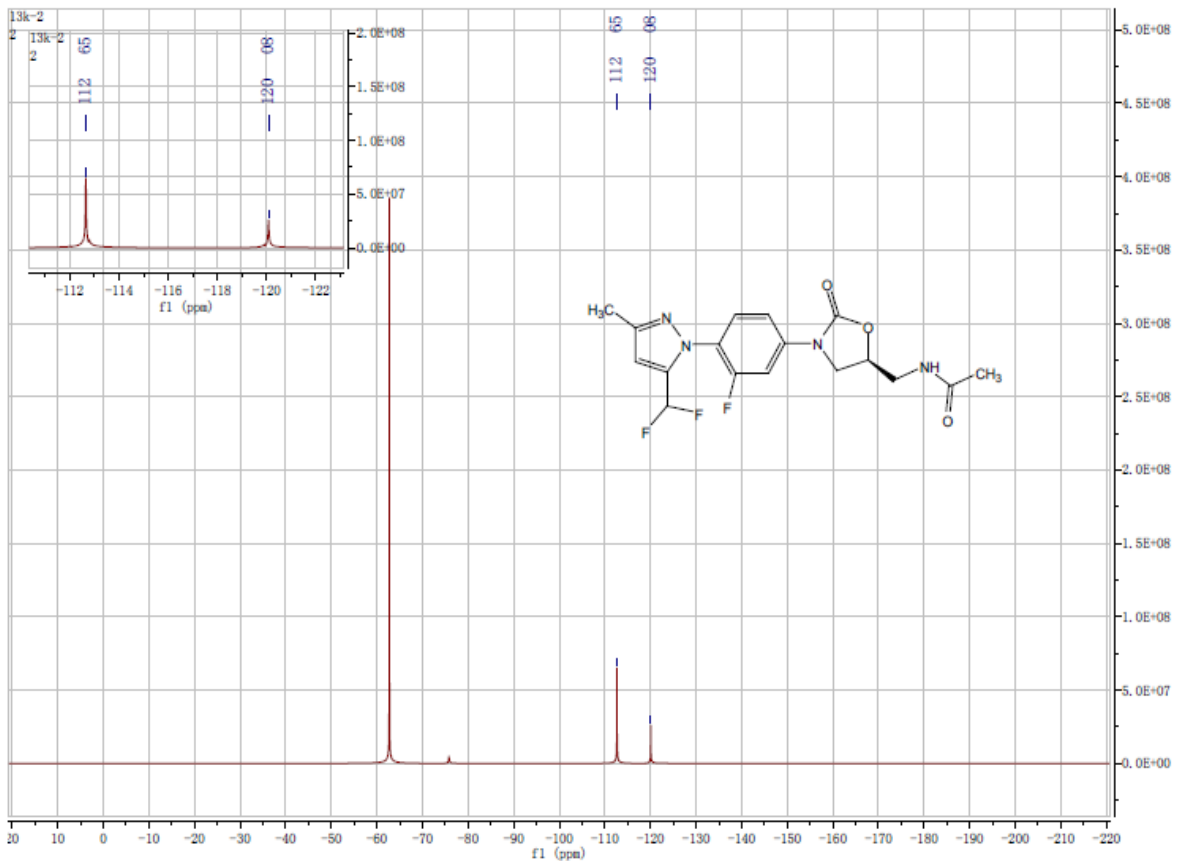

# HRMS, <sup>1</sup>H NMR, <sup>13</sup>C NMR and <sup>19</sup>F NMR spectra of **13I**

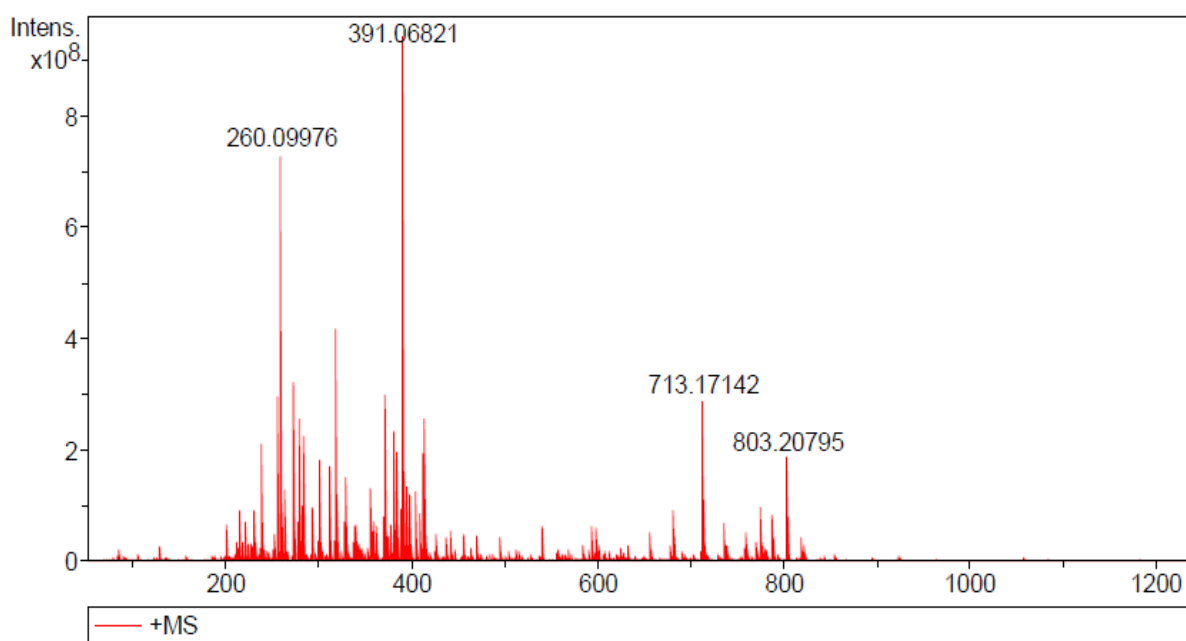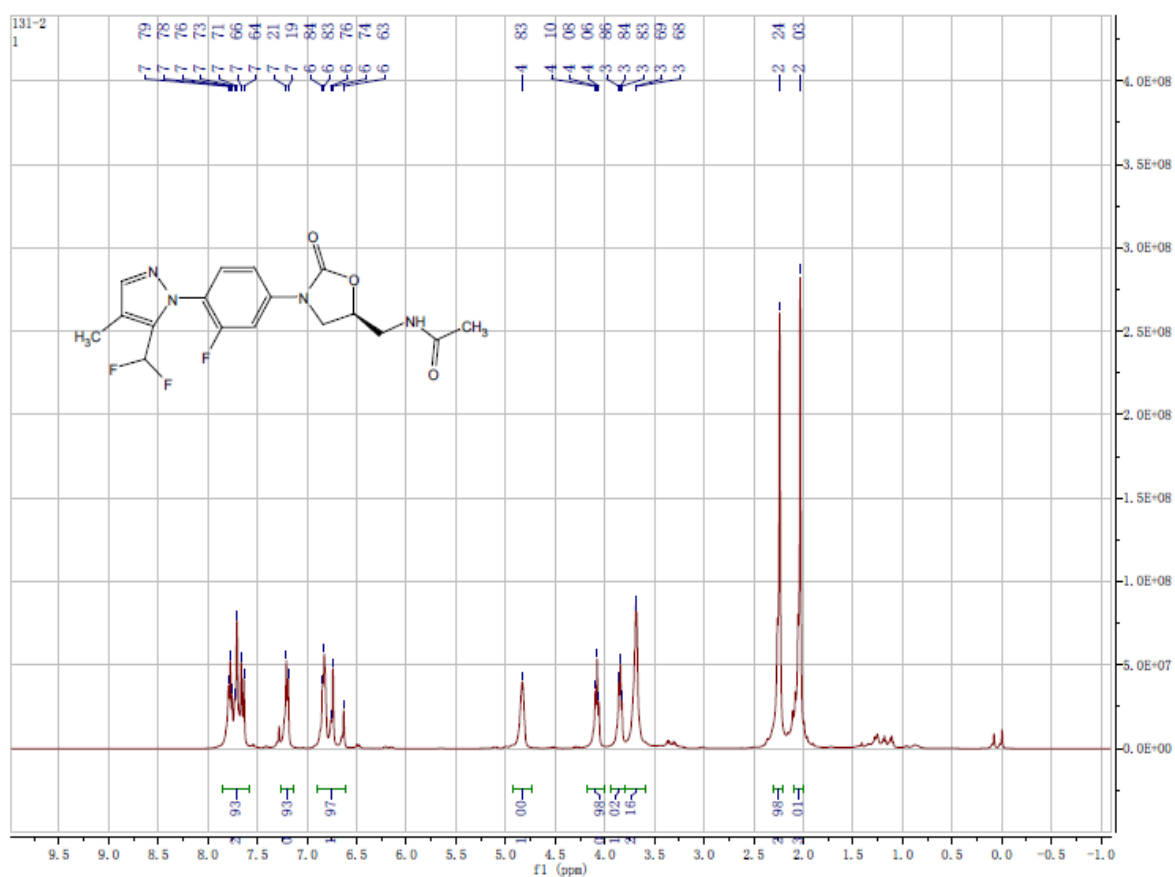



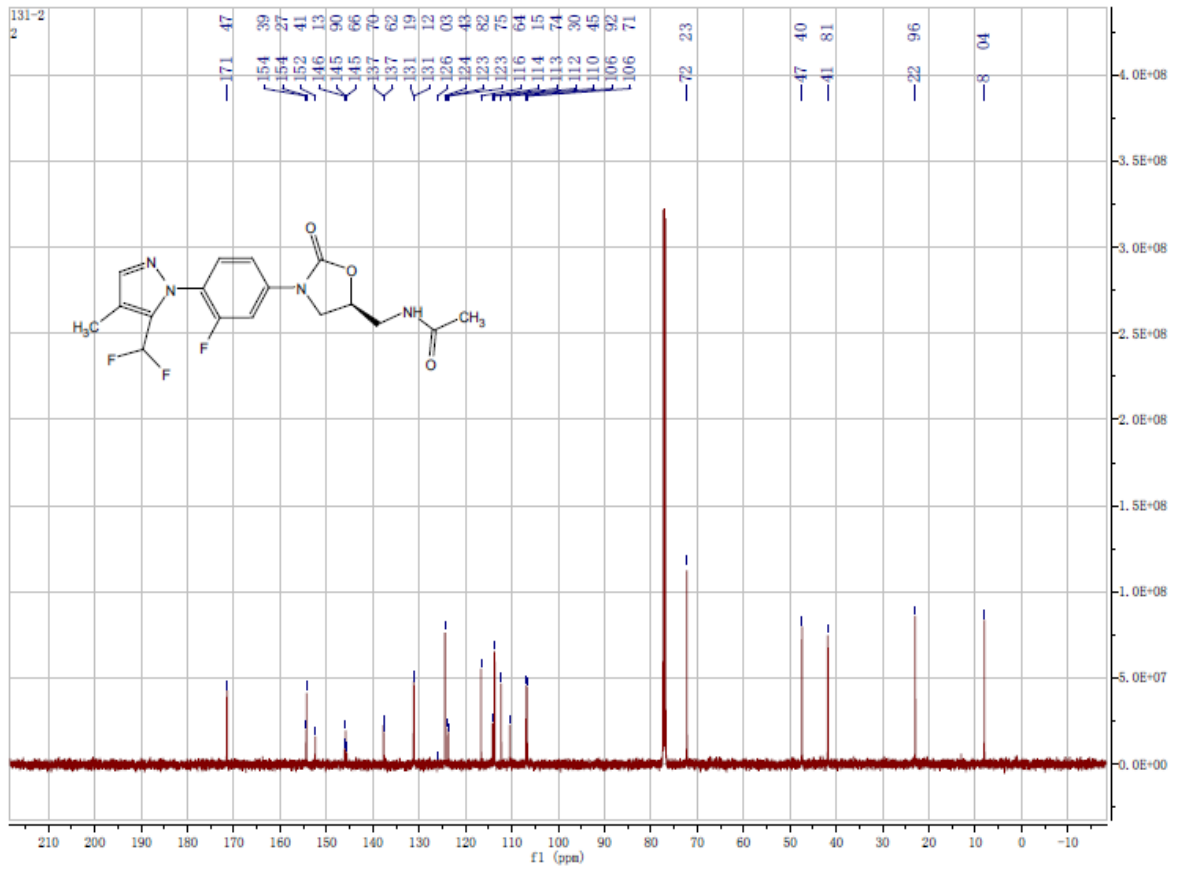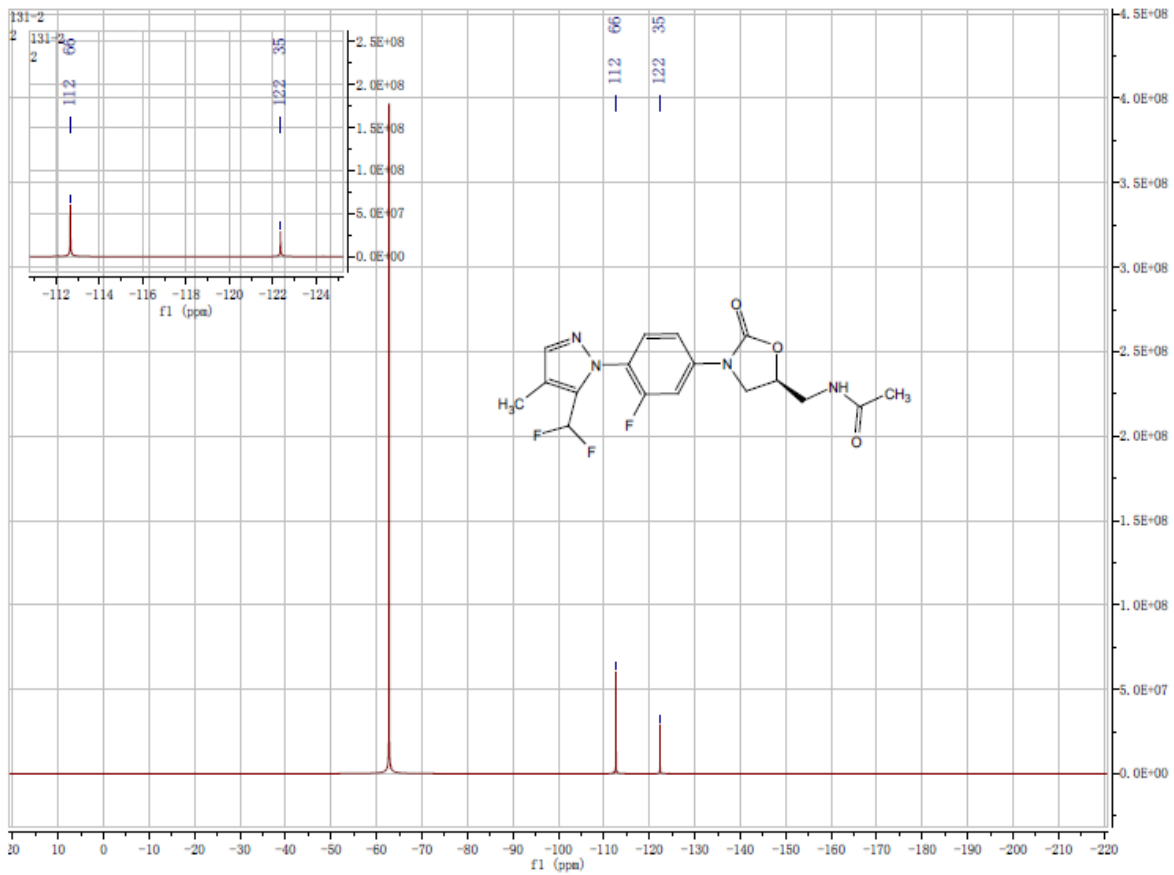

Supplement: c5ra11782h1.pdf [file c5ra11782h1.pdf]
